1 **Simultaneous decoding of cardiovascular and respiratory**  
2 **functional changes from pig intraneural vagus nerve signals**

3 **Fabio Vallone<sup>1,\*</sup>, Matteo Maria Ottaviani<sup>1,2,\*</sup>, Francesca Dedola<sup>1</sup>, Annarita Cutrone<sup>1</sup>,**  
4 **Simone Romeni<sup>3</sup>, Adele Macrí Panarese<sup>1</sup>, Fabio Bernini<sup>2</sup>, Marina Cracchiolo<sup>1</sup>, Khatia**  
5 **Gabisonia<sup>2,4</sup>, Nikoloz Gorgodze<sup>2,4</sup>, Alberto Mazzoni<sup>1</sup>, Fabio A. Recchia<sup>2,4,5</sup>, Silvestro**  
6 **Micera<sup>1,3</sup>**

7 <sup>1</sup>The BioRobotics Institute and Department of Excellence in Robotics and Artificial  
8 Intelligence, Scuola Superiore Sant'Anna, Pisa, Italy.

9 <sup>2</sup> Institute of Life Sciences, Scuola Superiore Sant'Anna, Pisa, Italy.

10 <sup>3</sup>Bertarelli Foundation Chair in Translational Neural Engineering, Center for  
11 Neuroprosthetics and Institute of Bioengineering, Ecole Polytechnique Federale de  
12 Lausanne, Lausanne, Switzerland.

13 <sup>4</sup>Fondazione Toscana Gabriele Monasterio, Pisa, Italy.

14 <sup>5</sup>Department of Physiology, Cardiovascular Research Center, Lewis Katz School of  
15 Medicine at Temple University, Philadelphia, Pennsylvania, USA.

16

17 (\*equal contribution)

18 Corresponding authors: Silvestro Micera ([silvestro.micera@santannapisa.it](mailto:silvestro.micera@santannapisa.it)[\[epfl.ch\]](mailto:silvestro.micera@epfl.ch)) and  
19 Fabio Recchia ([fabio.recchia@santannapisa.it](mailto:fabio.recchia@santannapisa.it)).

20

## 21 **Abstract**

22 Bioelectronic medicine is opening new perspectives for the treatment of some major chronic  
23 diseases through the physical modulation of autonomic nervous system activity. Being the  
24 main peripheral route for electrical signals between central nervous system and visceral  
25 organs, the vagus nerve (VN) is one of the most promising targets. Closed-loop  
26 neuromodulation would be crucial to increase effectiveness and reduce side effects, but it  
27 depends on the possibility of extracting useful physiological information from VN electrical  
28 activity, which is currently very limited.

29 Here, we present a new decoding algorithm properly detecting different functional changes  
30 from VN signals. They were recorded using intraneural electrodes in anaesthetized pigs  
31 during cardiovascular and respiratory challenges mimicking increases in arterial blood  
32 pressure, tidal volume and respiratory rate. A novel decoding algorithm was developed  
33 combining discrete wavelet transformation, principal component analysis, and ensemble  
34 learning made of classification trees. It robustly achieved high accuracy levels in identifying  
35 different functional changes and discriminating among them. We also introduced a new  
36 index for the characterization of recording and decoding performance of neural interfaces.  
37 Finally, by combining an anatomically validated hybrid neural model and discrimination  
38 analysis, we provided new evidence suggesting a functional topographical organization of  
39 VN fascicles. This study represents an important step towards the comprehension of VN  
40 signaling, paving the way to the development of effective closed-loop bioelectronic systems.

## 41 42 **Keywords**

43 Bioelectronic Medicine, Neuroprosthetics, Vagus Nerve, Intraneural Electrodes, Decoding  
44 Algorithm, Hybrid Modeling Framework.

45

46

## 47 **Introduction**

48 The autonomic nervous system (ANS) plays a crucial role in the self-governed maintenance  
49 of body homeostasis. In ANS peripheral nerves, afferent and efferent fibres run together,  
50 providing bidirectional communication between specific circuits of the central nervous  
51 system and visceral organs. The artificial modulation of this complex circuitry is the  
52 challenging goal of bioelectronic medicine (BM), a highly promising alternative to some  
53 limited pharmacological treatments<sup>1-3</sup>. Among the main ANS nerves, the vagus nerve (VN)  
54 represents a privileged target as it modulates vital functions like respiration, circulation and  
55 the digestion<sup>4</sup>. VN stimulation (VNS) of cervical segments has shown a great potential for  
56 the treatment of a wide range of pathological conditions such as epilepsy<sup>5</sup>, chronic heart  
57 failure<sup>6</sup>, and inflammatory diseases<sup>7,8</sup>. However, the formidable amount of afferent and  
58 efferent signals that simultaneously cross this VN segment, the numerous VNS side-effects<sup>9</sup>  
59 and the discovery of VN involvement in the regulation of complex functions like immunity<sup>10</sup>  
60 or central neuroplasticity<sup>11,12</sup> highlight the need for high precision and selectivity. In an ideal  
61 scenario, the therapeutic stimulation or inhibition of VN or any other ANS nerve should be:  
62 a) selectively directed to specific efferent or afferent fibres and b) regulated by a closed-loop  
63 feedback, thus adapting the stimulation to patient-specific conditions<sup>13-16</sup>. Importantly, the  
64 co-existence of afferent and efferent signals in the VN points to the possibility that the  
65 feedback loop is originated and closed at the same anatomical site. Nonetheless, VNS is  
66 currently applied in an open-loop fashion<sup>17,18</sup> and mainly delivered using epineural cuff-like  
67 electrodes, because of their relatively low invasiveness and versatility for chronic  
68 applications<sup>19,20</sup>.

69 The first step for the development of a closed loop modality would be the precise  
70 identification of physiological “states” by processing the autonomic neural signals. Different  
71 strategies have been recently adopted to extract function-specific markers from neural  
72 activity using epineural electrodes<sup>3,21–25</sup>. Specific neurograms related to the respiratory  
73 cycle<sup>21,22</sup> and blood pressure fluctuations<sup>3</sup> were recorded from pig VN using bipolar/tripolar  
74 ring cuff electrodes, while decoding strategies and methodological frameworks led to the  
75 identification of cytokine- and hypoglycemia/hyperglycemia-specific neural activity markers  
76 in murine VN and carotid sinus nerve<sup>23–25</sup>. However, epineural electrodes display a limited  
77 selectivity and can only record the compound activity that provides a global picture of neural  
78 signal trafficking<sup>26–28</sup>. Therefore, intraneural electrodes have been developed and  
79 successfully employed by us and others to enhance selectivity and increase the signal-to-  
80 noise ratio of recordings<sup>26,29</sup> in somatic nerves<sup>13,16,30,31</sup>. Nevertheless, this technology has  
81 received very limited attention for VN applications and only one preliminary study has been  
82 published to date<sup>32</sup>, which was based on a simple experimental protocol (steady neural  
83 activity) and a limited signal recording capacity (i.e. 4-channel electrode longitudinally  
84 implanted).

85 Here, we performed the first comprehensive study testing intraneural VN recording to  
86 identify physiological (arterial and respiratory) changes. To this aim, we recorded VN activity  
87 through intraneural multi-channel electrodes in anaesthetized pigs at baseline and during  
88 alterations in blood pressure and respiratory parameters, collectively named “functional  
89 challenges”. To discriminate between baseline condition and functional challenges and to  
90 investigate a possible functional organization of VN fascicles, we developed novel decoding  
91 algorithms and hybrid modeling framework (see next section and Methods).

## 92 **Results**

### 93 **Experimental setup and decoding method to classify functional challenges against** 94 **baseline**

95 To study the feasibility of decoding relevant physiological states based on VN neural activity,  
96 intrafascicular multichannel electrodes<sup>40</sup> were implanted into the cervical VN of 4  
97 anaesthetized and artificially ventilated pigs (p1, ..., p4) (Fig.1 a,b). Neural activity was  
98 recorded at baseline and during functional challenges obtained by infusing the vasopressor  
99 angiotensin II (AngII) to increase baseline blood pressure (BP) by 150% and/or by varying  
100 the ventilator parameters to increase respiratory rate (RR) and/or tidal volume (TV). These  
101 3 functional challenges, named BPC, RRC and TVC, were compared to baseline condition  
102 and among them (Fig.1c and Methods for details). To obtain the desired vasopressor effect,  
103 AngII infusion was maintained for  $8.8 \pm 0.8$  min (n=5) and mean BP increased from  $76 \pm 2.2$   
104 mmHg up to  $110 \pm 2.6$  mmHg (n=5).

105 A decoding algorithm was developed to process multivariate signals acquired from the multi-  
106 channel intraneural electrodes. To extract from the neural activity relevant features encoding  
107 for the functional challenges, we first employed a multi-scale decomposition analysis based  
108 on the discrete wavelet transform<sup>33,34</sup> to extract the high frequency component (>1500 Hz)  
109 of our recordings. Subsequently, we focused on the direction of greatest variance by using  
110 principal components analysis<sup>35</sup> (Fig. 1d and Methods for details). Then, an ensemble of  
111 classifiers made on classification trees<sup>36,37</sup> was trained and we assessed the classification  
112 performance on the test set using accuracy values (Fig. 1e and Methods for details).

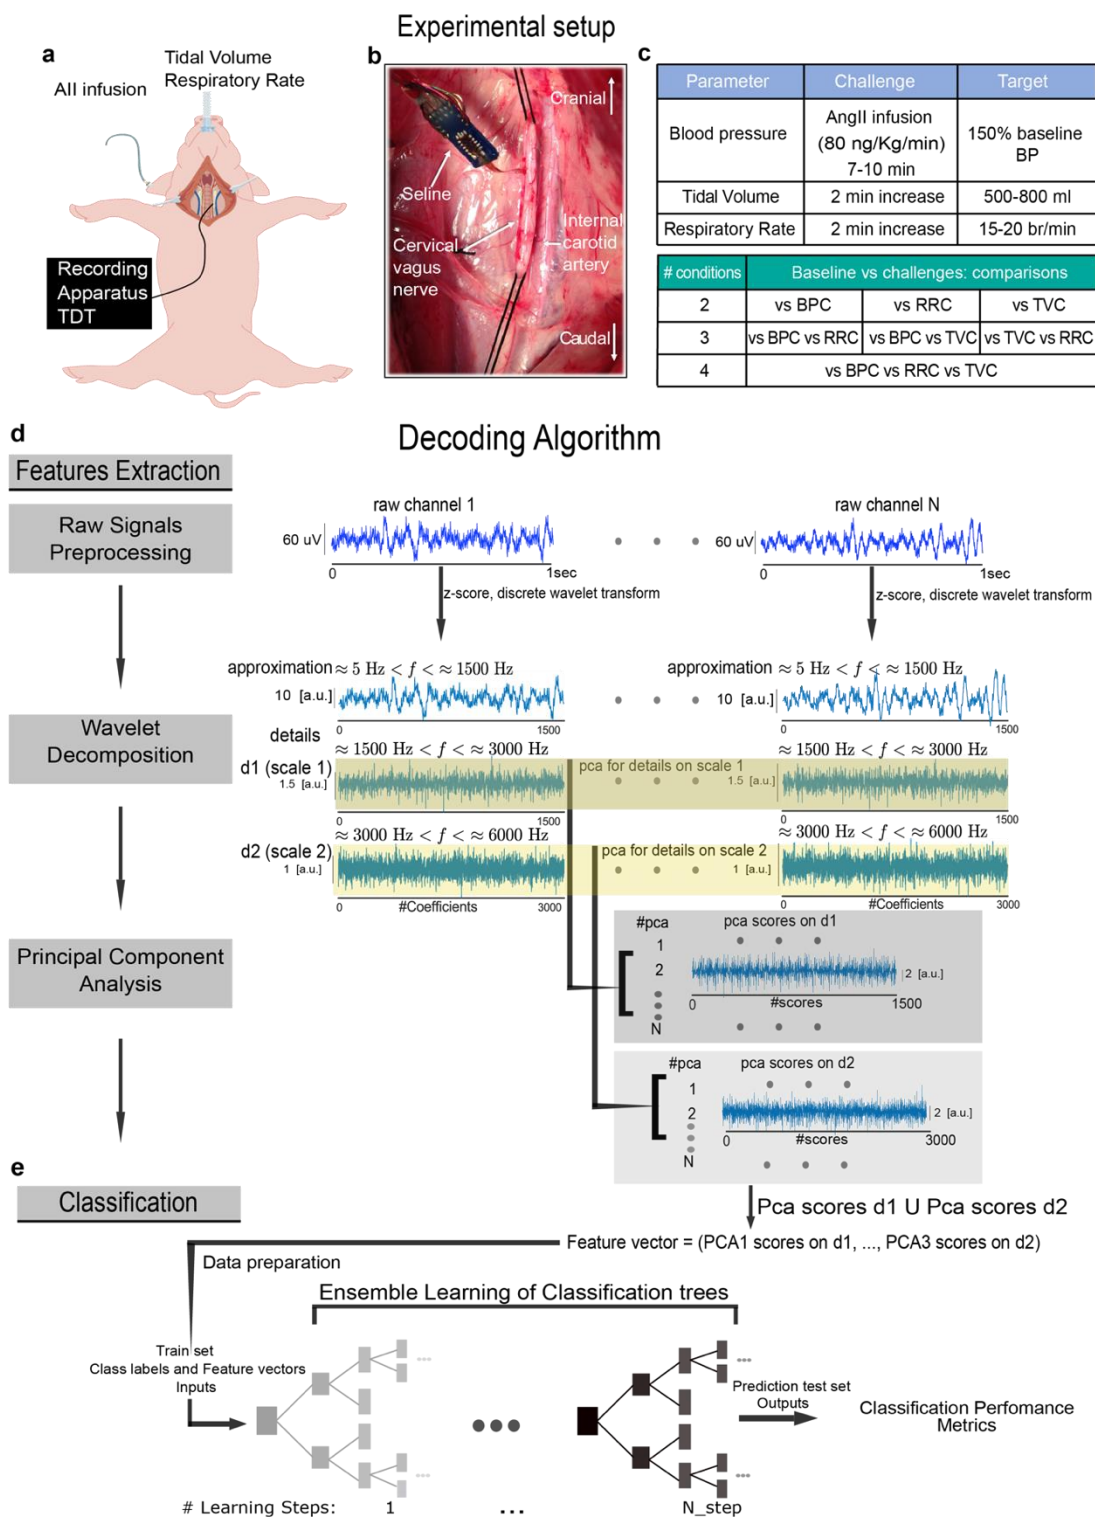

113

114 **Fig. 1** Schematic representation of the experimental setup and decoding algorithm **a,b** Recording apparatus and electrode implantation **c** Summary of the in vivo protocol and comparisons . **d** Decoding algorithm. Feature extraction was performed on raw signals by applying principal component analysis on wavelet details relative to two different scales. **e** Decoding performed with ensemble learning based on classification tree combined with random undersampling and boosting procedure (see Methods) was applied on feature vectors. Decoding performance was assessed by means of confusion matrices and accuracy level.

120

121 We tested our decoding algorithm in different scenarios, i.e., considering a progressively  
122 larger number and type of functional challenges. In two pigs (p3 and p4) we also studied the  
123 variation of the decoding performances relative to the positioning of two SELINEs (s1, s2)  
124 and (s3, s4) within the same nerves, thus testing the following combinations: p3-s1, p3-s2  
125 and p4-s3, p4-s4.

126

### 127 **Decoding the response to a single functional challenge**

128 We started with the simplest case in which we sought to discriminate only one of the three  
129 functional challenges against baseline. For baseline vs BPC, we achieved a mean accuracy  
130 level over the different recordings equal to  $90.7 \pm 5.7\%$  as shown in Fig. 2a (n=5, see  
131 Supplementary Fig. 1a for confusion matrices).

132 High-level accuracy during increased RRC was also obtained, equal to  $89.1 \pm 3.9\%$ , as  
133 shown in Fig. 2b (n=4, see also Supplementary Fig. 1b for confusion matrices).

134 Measurements during TVC yielded more heterogeneous results compared to the other  
135 challenges. In pig p2 that was implanted with TIME t2 (p2-t2), we achieved high accuracy  
136 level equal to 83.5% ([75.8%, 89.5%], Confidence Interval  $p=0.05$ , see Fig. 2c and  
137 Supplementary Fig. 1c for confusion matrices).

138 Moreover, the decoding accuracy during TVC was strongly dependent on the electrode  
139 positioning. In fact, in animals implanted with s1 and s4, i.e. p3-s1 and p4-s4, we obtained  
140 accuracy values statistically not different from chance level ( $p>0.05$ , binomial test, see Fig.  
141 2c and Supplementary Fig. 1c for confusion matrices), i.e. 45.7% for p3-s1 ( [36.8%, 54.7%],  
142 Confidence Interval  $p=0.05$ ) and 52.3% for p4-s4 ( [43.3%, 61.2%], Confidence Interval  
143  $p=0.05$ ). In the same animals, but with different electrode positioning, we achieved a high  
144 level of accuracy of 95.5% for p3-s2 ( [90.5%, 98.31%], Confidence Interval  $p=0.05$ ) and  
145 75% for p4-s3 ([66.6%, 82.2%], Confidence Interval  $p=0.05$ , see Fig. 2c and Supplementary

146 Fig. 1c for confusion matrices). Interestingly, in this scenario TIMEs and SELINEs performed  
147 similarly. Indeed, if we consider only the maximum accuracies achieved in each animal, thus  
148 neglecting possible confounding effects of electrode positioning, the TIME t1 in p2 achieved  
149 the maximum accuracy across animals in the case of baseline vs. BPC (Fig 2a), while  
150 SELINE s2 implanted in p3 performed better in the baseline vs. TVC, achieving a maximum  
151 accuracy in the animal p3-s2 (Fig. 2c). No significant differences between maximum  
152 accuracies were found for baseline vs. RRC (see Fig. 2b, p2-t2 vs. p4-s3 and p2-t2 vs p3-  
153 s2,  $p > 0.05$  Chi square test, Bonferroni correction).

154 The differences between two levels of RRC and TVC in p2 (from 10 to 15 respiratory  
155 cycles/min and from 400 to 500 ml, respectively) compared to p3 and p4 (from 10 to 20  
156 respiratory cycles/min and from 400 to 800 ml, respectively) did not indicate strong  
157 differences in the decoding performances. In fact, if we compared the maximum accuracies  
158 obtained in a single animal (i.e., to neglect the effect of a possible dependency of electrode  
159 position) only in the case of baseline vs. TVC, the accuracy achieved in p2-t2 was lower  
160 than the maximum one observed in p3-s2 (Fig.2c,  $p < 0.05$  Chi square test, Bonferroni  
161 correction), while no statistical differences were found ( $p > 0.05$  Chi square test, Bonferroni  
162 correction) in the other cases (Fig.2b p2-t2 vs p3-s4, p2-t2 vs p4-s3, and Fig.2c p2-t2 vs  
163 p4-s3).

164 Finally, a dependence on electrode position was also observed in pigs p4 and p3 for the  
165 comparisons of baseline vs. BPC (Fig.2a) and baseline vs. RRC (Fig. 2c), respectively. In  
166 fact, the accuracy value for p4-s3 (96%, [92.5%, 98.1%] Confidence Interval  $p = 0.05$ , Fig.2a)  
167 was greater than p4-s4 (68.5%, [62.2%, 74.3%] Confidence Interval  $p = 0.05$ , Fig.2a)  
168 ( $p < 0.001$  Chi square test, Bonferroni correction). Moreover, in pig p3 implanted with SELINE  
169 s1 and s2, i.e. p3-s1 and p3-s2, we achieved a lower level of accuracy for p3-s1 (74%,  
170 [66.1%, 80.9%] Confidence Interval  $p = 0.05$ , Fig.2b) with respect to p3-s2 (93.2%, [87.5%,



171 96.8%] Confidence Interval  $p=0.05$ , Fig.2b) ( $p<0.001$  Chi square test, Bonferroni  
 172 correction).

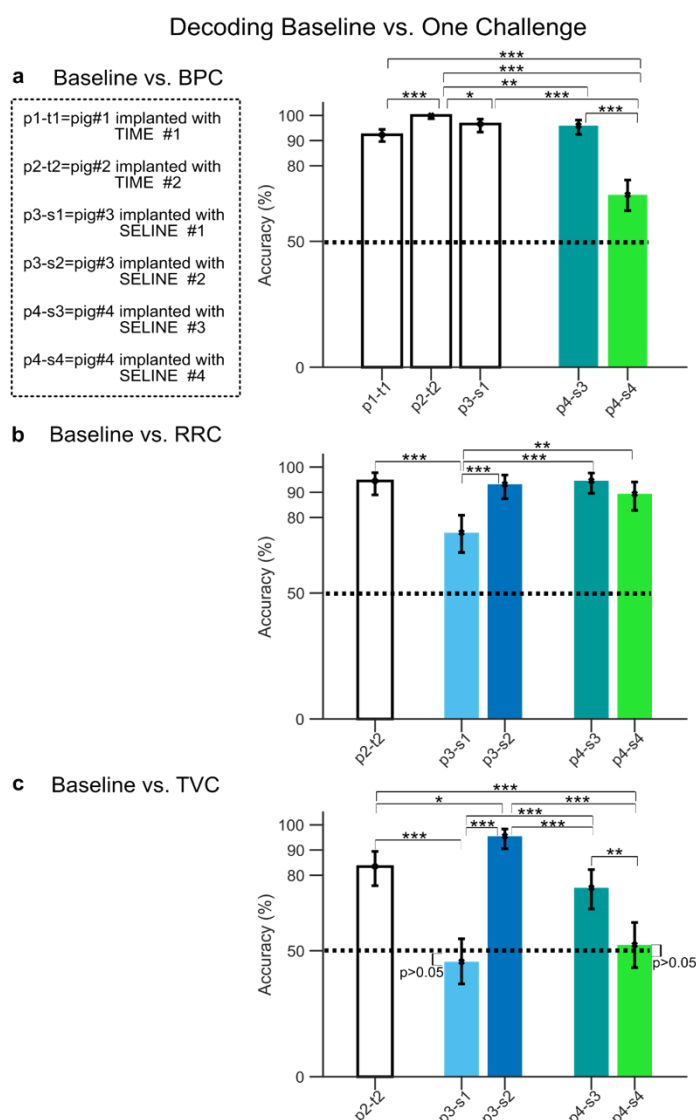

173

174 **Fig. 2** Decoding accuracy for baseline condition vs. a single functional challenge **a,b,c** Accuracy level  
 175 together with  $p=0.05$  confidence interval (error bars, Clopper-Pearson method) for the comparison between  
 176 baseline and BPC (panel a), RRC (panel b) and TVC (panel c). For all panels, colored bars indicate the  
 177 same animal implanted with two different electrodes. Dashed lines represent chance level. To test statistically  
 178 significant differences with respect to chance level in the cases where confidence intervals overlapped with  
 179 chance level, a binomial test was used (panel c, animals p3-s1 and p4-s3,  $p>0.05$  binomial test). Statistical  
 180 comparisons between animals were assessed by using a Chi square test Bonferroni corrected for multiple  
 181 comparisons (\* $p<0.05$ , \*\* $p<0.01$ , \*\*\* $p<0.001$ ).

182

### 183 Decoding the response to multiple functional challenges

184 We increased the complexity of the decoding task by producing two simultaneous functional  
 185 challenges in different physiological systems, e.g. BPC plus RRC or TVC, or in the same

186 system, namely RRC and TVC. As expected, the highest accuracy levels were achieved  
187 when alterations were simultaneously induced in different systems (Fig. 3a,b and  
188 Supplementary Fig. 2a,b).

189 The accuracy values for the BPC vs. RRC case were  $81.6 \pm 7.1\%$  ( $n=4$ ), as shown in Fig. 3a  
190 and Supplementary Fig. 2a for confusion matrices. Statistical differences between accuracy  
191 values of p4-s3 (81.7%, [76.7%, 86.1%] Confidence Interval  $p=0.05$ ) and p4-s4 (81.7%,  
192 [57.1%, 68.8%] Confidence Interval  $p=0.05$ ) indicate dependency on electrode position  
193 ( $p<0.001$  Chi square test, Bonferroni corrected).

194 Dependency on electrode position was observed also for BPC vs TVC: in the animal  
195 implanted with s4, i.e. p4-s4, we found a statistically significant different accuracy level  
196 (54.2%, [48.1%, 60.2%] Confidence Interval  $p=0.05$ ), than for p4-s3 (83.9%, [78.8%, 88.1%]  
197 Confidence Interval  $p=0.05$ ) ( $p<0.001$  Chi square test, Bonferroni corrected, see Fig. 3b).  
198 Overall, we obtained a mean over recordings  $75.8 \pm 8.2\%$  accuracy ( $n=4$ ), as shown in Fig.  
199 3b and Supplementary Fig. 2b for confusion matrices.

200 We were also able to reliably decode the two respiratory challenges RRC and TVC when  
201 occurring simultaneously. We found that in animals p3 and p4 the electrodes s2 and s3  
202 achieved a high level of accuracy, 85.6% ([79.4%, 90.4%] Confidence Interval  $p=0.05$ ) and  
203 81% ([74.6%,86.4%] Confidence Interval  $p=0.05$ ), respectively, as shown in Fig. 3c and  
204 Supplementary Fig. 2c. In contrast, in the same animals, the electrodes s1 and s4 implanted  
205 in different positions were only able to reach accuracy values equal to 44.8%([37.5%, 52.3%]  
206 Confidence Interval  $p=0.05$ ) and 45%([37.2%, 52.8%] Confidence Interval  $p=0.05$ ) for p3-s1  
207 and p4-s4, respectively, as shown in Fig. 3c and Supplementary Fig. 2c. Moreover, in p1  
208 implanted with TIME t2, we achieved accuracy values equal to 68.9% ([61.2%, 75.9%]  
209 Confidence Interval  $p=0.05$ ). In this configuration, TIMEs seemed to perform better than  
210 SELINE in two cases, as the maximum accuracy for the cases BPC vs. RRC and BPC vs.

211 TVC were obtained by p2-t2 (Fig. 3a,b, p2-t2 vs p3-s1 and p2-t2 vs. p4-s3,  $p < 0.001$  Chi  
212 square test, Bonferroni correction, respectively). However, the maximum accuracy for TVC  
213 vs. RRC was obtained by SELINE s2 implanted in p3, i.e. p3-s2 (Fig. 3c, p3-s2 vs p2-t2,  
214  $p < 0.01$  Chi square test, Bonferroni correction).

215 Finally, we studied the most complex scenario of our experimental dataset in which all types  
216 of functional challenges (one cardiovascular and two respiratory) are decoded  
217 simultaneously. As discussed above, also in this case we found that decoding performances  
218 depended on electrode positioning within the same animal p4. The accuracy levels were  
219 73.7% for p4-s3 ([68.5%, 78.5%] Confidence Interval  $p = 0.05$ ) and 45.3% for p4-s4 ([39.7%,  
220 51%] Confidence Interval  $p = 0.05$ ), as shown in Fig. 4a and Fig4c for confusion matrices.  
221 The highest accuracy among animals was obtained by TIME t2 implanted in p2, i.e. p2-t2,  
222 with a value equal to 87.3% ([83.3%, 90.6%] Confidence Interval  $p = 0.05$ ) (Fig 4a).

223 Furthermore, to better understand why different accuracy values were obtained in our  
224 datasets, we searched for a possible correlation between the electrode discrimination ability,  
225 i.e. the sensitivity of the recording sites to the specific challenges, and the decoding  
226 performance. Electrode discrimination ability (EDA) was assessed by calculating the percent  
227 activation of each recording site of the electrode with respect to the different functional  
228 challenges (see Methods for details and Supplementary Figures 3 and 4 for a graphical  
229 example). In this way, the ensemble of channels activations forms a discrimination vector  
230 for each functional challenge. Intuitively, the greater the difference between those  
231 discrimination vectors representing different functional challenges, the more discriminative  
232 is the electrode (Supplementary Fig.4b,c for distance matrices). We then calculated the  
233 linear correlation coefficient between EDA and accuracy (Fig. 4b) and found a correlation  
234 value, towards statistical significance, between electrode discrimination properties and

235 decoding performance (Fig. 4b Pearson correlation coefficients for accuracy vs. EDA  $r =$   
236  $0.66$  and  $n = 4, p = 0.3$  ).

237

### 238 **A hybrid model framework to map the functional spatial organization of VN fascicles**

239 The site-related sensitivity to specific functional challenges indicated a possible functional  
240 spatial organization of VN fascicles, which we explored by combining the information  
241 obtained from histological analysis with simulations of electric potential field and  
242 discrimination properties of the electrodes.

243 The spatial relationship between VN fascicles and electrode active sites was determined by  
244 histological examination in one animal, p4 (see Methods for details). We reasonably assume  
245 that the overall nerve morphology in terms of fascicular structure and organization is  
246 constant along the implant site, so we morphologically modelled the SELINE active sites on  
247 the same 2D transverse section representation of the VN (Fig. 5 panels a, b, left and middle  
248 figures, for SELINEs s3 and s4 implanted in p4, respectively).

249 Based on the histological analysis, we constructed a hybrid modeling framework<sup>38,39,41</sup> to  
250 understand the spatial distribution of electrical potential fields in the nerve sections of p4-s3  
251 and p4-s4 (see Methods for details). In Supplementary Figures 5 and 6 (panel b),  
252 isopotential electric field lines corresponding to each nerve section and 3 different recording  
253 sites are shown (p4-s3 and p4-s4, respectively). Using the Helmholtz reciprocity theorem<sup>41</sup>,  
254 these potential values quantify the recording capability of a given active site favored by the  
255 specific position of a fascicle located inside the nerve<sup>42</sup>. Since we were interested in the  
256 global electrical activity of fascicles, we employed a mean field approach by averaging the  
257 potential values within a given fascicle (Supplementary Figures 5 and 6 panel c, left) for  
258 nerve section p4-s3 and p4-s4, respectively.

### Decoding Baseline vs. Two Challenges

#### a Baseline vs. BPC vs. RRC

p2-t2=pig#2 implanted with TIME #2  
 p3-s1=pig#3 implanted with SELINE #1  
 p3-s2=pig#3 implanted with SELINE #2  
 p4-s3=pig#4 implanted with SELINE #3  
 p4-s4=pig#4 implanted with SELINE #4

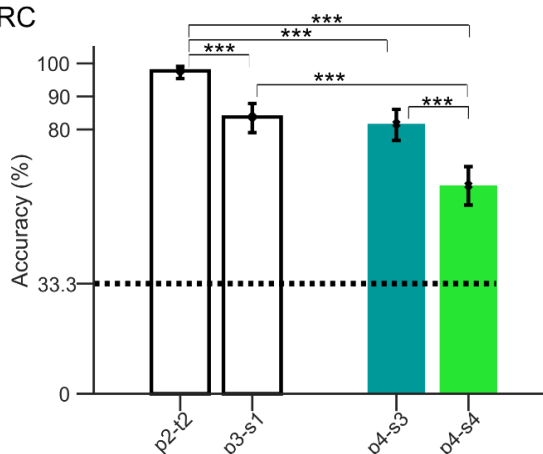

#### b Baseline vs. BPC vs. TVC

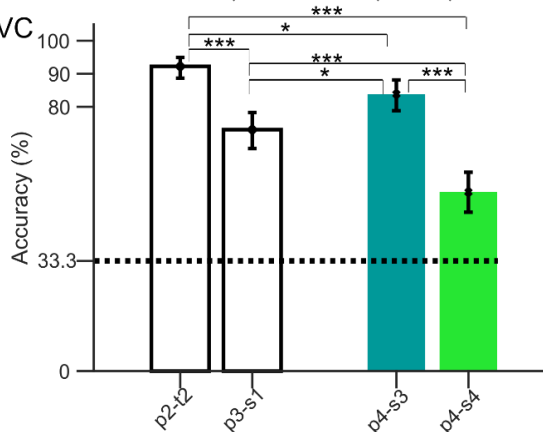

#### c Baseline vs. TVC vs. RRC

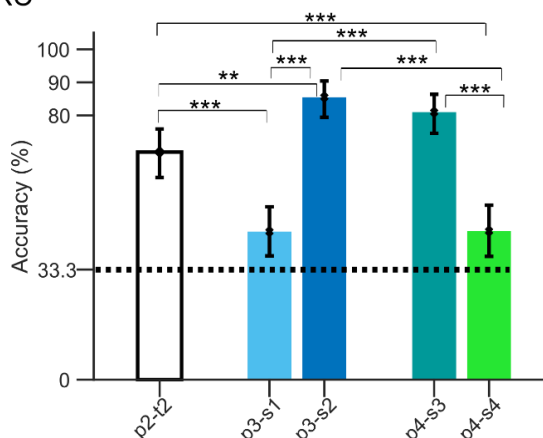

259

260 **Fig. 3** Decoding accuracy for baseline condition vs. two functional challenges. Accuracy level together with  
 261 confidence intervals (error bars, Clopper-Pearson method) for the comparison between baseline and BPC vs  
 262 RRC (panel a), BPC vs TVC (panel b), RRC vs TVC (panel c). For all panels, colored bars indicate the same  
 263 animal implanted with two different electrodes. Dashed lines represent chance level. Statistical comparisons  
 264 between animals were assessed by using a Chi square test Bonferroni corrected for multiple comparisons  
 265 (\* $p < 0.05$ , \*\* $p < 0.01$ , \*\*\* $p < 0.001$ ).

## Decoding Baseline vs. Three Challenges

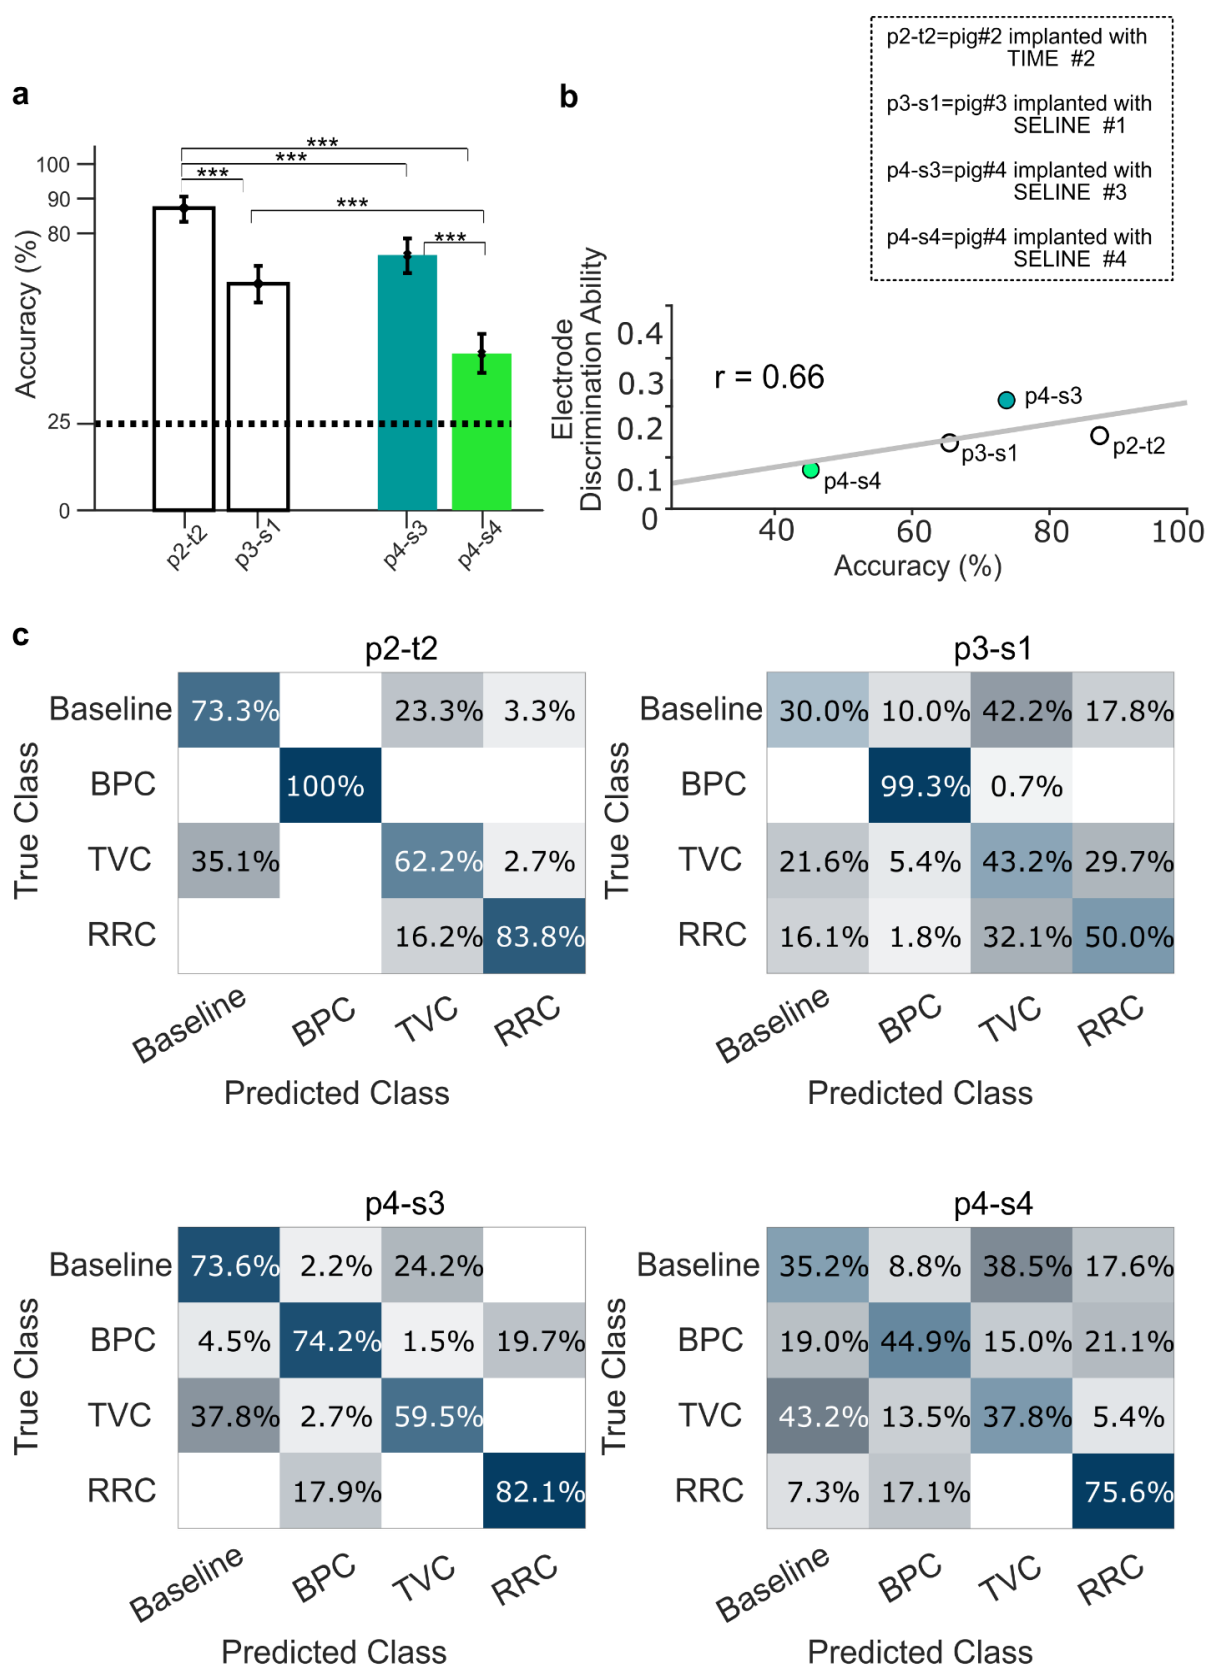

266  
267  
268  
269

**Fig. 4** Decoding accuracy for baseline condition vs. 3 functional challenges and relation between electrode discrimination ability and decoding performances. **a** Accuracy level together with confidence intervals (error bars, Clopper-Pearson method) for the comparison between baseline and BPC, TVC and RRC. Colored bars

270 indicate the same animal implanted with two different electrodes. Dashed lines represent chance levels.  
271 Statistical comparisons between animals were assessed by using a Chi square test Bonferroni corrected for  
272 multiple comparisons (\* $p < 0.05$ , \*\* $p < 0.01$ , \*\*\* $p < 0.001$ ). **b** Linear relationship between electrode discrimination  
273 ability and accuracy level, linear correlation coefficient is reported. **c** Confusion matrices for all the recordings.  
274

275 To quantitatively characterize the association of a given fascicle with a specific functional  
276 challenge, we weighted the discrimination index of each active site with the mean field  
277 generated by that fascicle recorded from that active site. We then averaged data obtained  
278 from all recording sites and normalized the average to the total mean field, thus obtaining  
279 what we called Discriminative Field Potential (DFP, see Methods for details). In this way, we  
280 developed for the first time a quantitative measure characterizing how a fascicle is related  
281 to a given functional challenge. This measure could be considered the equivalent, for  
282 recording, of the selectivity index<sup>20,38</sup> quantifying the stimulation ability on an electrode to  
283 elicit the activation of targeted fibres.

284 DFP patterns related to baseline condition and functional challenges were obtained for each  
285 nerve section p4-s3 and p4-s4, as shown in Figure 5 a,b, right panels, respectively, and  
286 Supplementary Figures 5 and 6 panel c bottom, respectively. Interestingly, for both nerve  
287 sections p4-s3 and p4-s4, the baseline condition exhibited a balanced DFP pattern where  
288 each fascicle is activated in the same manner. On the contrary, DFP magnitude was higher  
289 and differences between DFP patterns within each nerve were more pronounced in p4-s3  
290 than in p4-s4 as shown in Figure 5 a,b, right panels, respectively, and Supplementary  
291 Figures 5 and 6 panel c bottom, respectively. We quantified them by calculating the root  
292 mean square level of the Euclidean distance among the DFP values of each fascicle for  
293 each possible comparison between functional challenges (mean discriminative distance).  
294 We found a statistically significant higher mean discriminative distance of the nerve in p4-  
295 s3 with respect to p4-s4 ( $p = 0.003$  unpaired t-test,  $n = 6$  all possible functional challenges  
296 combination). This was consistent with the higher effectiveness of decoding based on p4-  
297 s3 recordings.

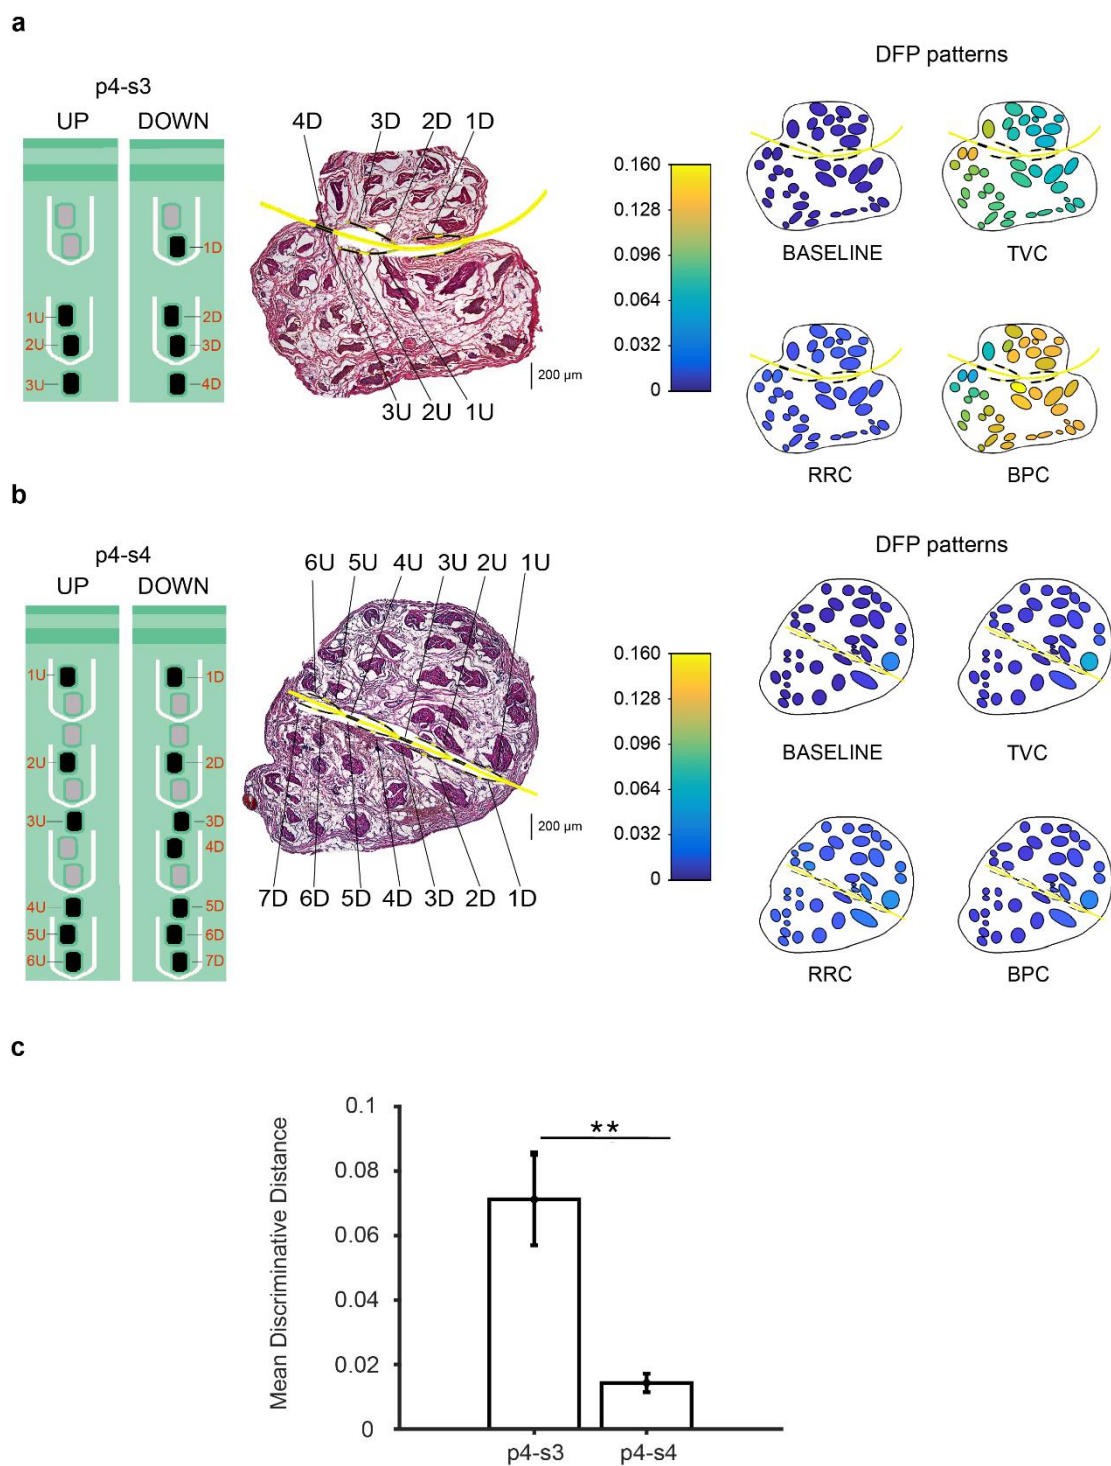

298

299 **Fig. 5** Schematic description of the two SELINE (s3 and s4) implantation in the VN of p4 and hybrid model  
 300 simulations of fascicles activation at baseline and in response to functional challenges. **a,b** SELINE s3 and s4  
 301 (left panels a,b, respectively) are represented on a VN histological section (central panels a,b respectively).  
 302 DFP patterns of activity during baseline and each functional challenge (left panels). **c** Mean Discriminative  
 303 Distance between DFP patterns ( $p=0.003$  unpaired t-test  $n=6$ ,  $p>0.05$  Kolmogorov-Smirnov).  
 304

305

306



## 307 **Discussion**

308 Bioelectronic medicine may lead to revolutionary treatments for an ample variety of  
309 diseases. However, therapeutic neuromodulatory interventions must be very precise, both  
310 spatially, activating specific nerve fibres to avoid side effects, and temporally, i.e., operating  
311 in closed-loop to mimic the natural conditions. Therefore, it is necessary to utilize neural  
312 interfaces to selectively stimulate ANS nerves (spatial precision) and to decode signals  
313 triggered by specific functional changes, so that the stimulation is activated only when  
314 necessary (temporal precision) and subjected to a feedback control.

315 The present study provides the first evidence that signals recorded with intraneural  
316 electrodes in pig VN can be reliably used to detect functional changes in the cardiovascular  
317 and/or respiratory system.

318 We perturbed the homeostasis of one of both systems with functional challenges that were  
319 expected to enhance the activity of aortic baroreceptors and/or lung stretch receptors.  
320 Electrical signals departing from those receptors run along afferent fibres of the VN, carrying  
321 to the CNS information on blood pressure changes and lung inflation state<sup>43</sup>. Although  
322 induced with pharmacological and mechanical stimuli, these hemodynamic and respiratory  
323 alterations mimic very common pathophysiological conditions such as hypertension,  
324 tachypnea, and polypnea. Exploiting our previous experience with somatic nerves<sup>31</sup> and  
325 differently from previous studies<sup>3,21,23,24,32</sup> that employed spike sorting methods<sup>23,24</sup> or  
326 extracted neural profiles correlated with specific physiological variables<sup>3,21,32</sup>, we considered  
327 the whole high frequency components of our signals processed with a novel advanced  
328 machine learning approach. This method proved successful in achieving high-level accuracy  
329 for the decoding of the functional challenges. In such regard, the pig VN is ideal for the  
330 development of clinically relevant technologies. The fascicular organization of pig VN is the  
331 closest to the complexity of human VN intraneural morphology compared to other species

332 commonly utilized in experimental research<sup>44</sup>. For instance, other studies have shown the  
333 possibility to decode different functional challenges in the murine VN<sup>23,24</sup>, which,  
334 unfortunately, contains less fibres which are not subdivided in fascicles.

335 To the best of our knowledge, prior studies in pig VN<sup>3,21,32</sup> did not demonstrate the possibility  
336 to decode multiple functional challenges. While cuff<sup>3,21</sup> and intraneural<sup>32</sup> electrodes in pigs  
337 proved effective in extrapolating neural markers of blood pressure and respiratory activity,  
338 no decoding analysis for the identification of mixed functional challenges was attempted.  
339 Moreover, the recordings with cuff electrodes<sup>3,21</sup> were not obtained during the same  
340 experimental session.

341 In this study we exploited intraneural (TIMEs and SELINEs) electrodes, which are conceived  
342 to be transversally or obliquely inserted into the nerve, allowing spatially selective stimulation  
343 and recording from different fascicles innervating distinct peripheral targets<sup>45,46</sup>. Our results  
344 show that the quality of decoding performances depends on the electrode position. This  
345 could be due to the different functional role of fascicles adjacent to the recording sites and  
346 prompts the hypothesis of a specific spatial segregation of vagal fibres traversed by specific  
347 signals. Therefore, to map a possible spatial functional organization of VN fascicles, we  
348 employed a hybrid modeling framework based on histological analysis combined with  
349 electrodes discrimination ability properties. We assumed that the discrimination of a given  
350 functional challenge in a specific recording site is higher when the local fibres are activated  
351 by that specific stimulus and the local recording capability is high. Based on this assumption,  
352 we developed a novel quantitative measure called Discriminative Field Potential (DFP),  
353 obtaining distinct spatial configurations of discriminative patterns generated by fascicles  
354 during the various functional challenges. It is important to note that the good reliability of  
355 DFP patterns resulted from the use of intraneural electrodes, which potentially provide a  
356 more accurate recording of the fascicles neural activity compared to epineural electrodes.

357 Moreover, placing a large number of active sites along the intraneural implant would  
358 augment the interfaces with fascicles, thus reducing the number of implanted electrodes<sup>29</sup>.  
359 The present findings strongly suggest that multi-contact electrodes positioning is of crucial  
360 importance for bioelectronic applications in a complex nerve such as the VN. In our opinion,  
361 the development of an anatomical and electrophysiological in silico model of the VN would  
362 be extremely useful to guide electrodes implantation and positioning and to overcome the  
363 present limitations. In this regard, the pig VN represents an excellent model, given its  
364 marked fasciculation, which likely reflects an equivalent high spatial segregation of fibres  
365 innervating different peripheral sites.

366

367 **Limitations and future directions.** The present study was performed in an acute  
368 experimental preparation and it is known that anesthesia exerts important effects on neural  
369 activity and other physiological systems. For this reason, our next step will consist of  
370 validating the implantation of intraneural electrodes for VN chronic recordings in non-  
371 anesthetized animals. Moreover, our results seem to indicate that TIMEs could perform  
372 better than SELINE, but more experiments are necessary to confirm these results. Finally,  
373 another important step will be its implementation and validation of online signal analysis,  
374 necessary for closed-loop VNS protocols.

375

376 **Conclusions.** The present results are an important step towards more precise  
377 neuromodulation protocols based on the knowledge of specific patterns of neural activations  
378 recordable in VN under physiological and pathological conditions. Advanced closed-loop  
379 and spatially selective VNS could improve the treatment of pathological conditions by  
380 selectively activating functionally specialized fibre fascicles, thus preventing the numerous  
381 side-effects caused by the current technology.

382 The importance of understanding VN signals extends beyond VNS and closed-loop  
383 applications. Being the biggest peripheral crossroad of signals between the CNS and  
384 visceral organs, a sensitive and reliable technology for detection and decoding of VN activity  
385 could serve for the diagnosis of pathophysiological conditions otherwise difficult to detect.  
386 Deciphering the “vagal language” will also help clarifying the mechanisms by which VNS  
387 exerts its curative effects and gaining deeper insights in the VN regulation of specific  
388 physiological processes.

389

390

391

392

393

394

395

396

397

398

399

400

401

402

403

404

405

## 406 **Materials and methods**

407

408 **Animals.** This study was conducted in four castrated male farm pigs (*Sus Scrofa*  
409 *Domesticus*) 3-4-month old and weighing 28-30 kg. The animals were housed in the  
410 vivarium at room temperature (24°C) and fasted overnight before anesthesia with free  
411 access to water. All animal handling and experimental procedures were performed  
412 according to European Community guidelines (EC Council Directive 2010/63) and the Italian  
413 legislation on animal experimentation (Decreto Legislativo D.Lgs 26/2014).

414

415 **Anesthesia and monitoring of physiological parameters.** On the day of the experiment,  
416 pigs were anesthetized and prepared for surgery as previously described by us<sup>47</sup>. They were  
417 sedated with a cocktail of 4 mg/kg tiletamine hydrochloride and 4 mg/kg zolazepam  
418 hydrochloride injected intramuscularly, intubated and mechanically ventilated. The  
419 respiratory frequency was fixed to 10 respiratory cycles per minute and the tidal volume (TV)  
420 to 400 ml. The combination of these respiratory parameters resulted in PaO<sub>2</sub> > 100 mmHg,  
421 PaCO<sub>2</sub> < 40 mmHg and arterial blood pH in the range of 7.4-7.45. Arterial blood gases  
422 analysis was repeated at least every 30 min. A pulse oximeter was applied on the tongue to  
423 continuously monitor arterial oxygen saturation, which was stably above 96% for the  
424 duration of the experiment. Inhalatory anesthesia was maintained with a mixture of 1-1,5%  
425 isoflurane dissolved in 79% air and 21% oxygen. The respiratory pressure was recorded by  
426 connecting the airflow of the ventilator to a pressure transducer. Electrocardiogram (ECG),  
427 heart rate, and arterial blood pressure were constantly monitored. Aortic blood pressure was  
428 recorded using a solid-state pressure transducer catheter (Millar, SPR-100) inserted in the  
429 left femoral artery with the tip positioned in the abdominal aorta. This catheter was also used  
430 to withdraw arterial blood for blood gas analysis. Glycemia was checked every 30 min and

431 before each recording session to assess the stability of plasma glucose levels above 100  
432 mg/100 ml. The main ear vein was cannulated for the intravenous administration of all the  
433 drugs.

434

435 **Surgical preparation and electrode implantations.** The 4 pigs were named p1, p2, p3  
436 and p4. To isolate the cervical VN, a midline cervical incision was made from the level of the  
437 larynx to the sternum, as previously described by us<sup>48</sup>. After identifying the neurovascular  
438 bundle of the neck (common carotid artery, internal jugular vein and VN), the left (n = 3) and  
439 right (n = 1) cervical VNs were delicately separated from the common carotid artery by blunt  
440 dissection, 3-4 cm above and below the cricoid cartilage. The sympathetic trunk, attached  
441 dorsally to the VN, was gently detached and pulled apart. In animals p1 and p2, the left VN  
442 was implanted in correspondence of the cricoid cartilage with a transverse intrafascicular  
443 multichannel electrode (TIME) endowed with 10 active sites, following the same procedures  
444 described by Badia et al<sup>49</sup>. In p3 and p4, the left and right VNs, respectively, were implanted  
445 with 2 self-opening intraneural peripheral interfaces (SELINES) endowed with 7-16 active  
446 sites. SELINES implantation followed the same procedures described by Cutrone et al<sup>46</sup>. All  
447 the intraneural electrodes were inserted obliquely, forming a 45° angle with the longitudinal  
448 axis of the nerve, except for 2 SELINES, one in p3 and one in p4, that were inserted along  
449 the transverse axis. In all the experiments, the ground electrode was inserted under the skin  
450 of the left elbow of the animal.

451

452 **Tissue isolation and histology.** At the end of the experiment, the anesthetized pigs were  
453 euthanized by an intravenous injection of saturated KCl solution. Intraneural electrodes were  
454 left in place and the VN was cut 3 cm above and below the insertion site and gently placed  
455 on a dedicated support to avoid twisting. The VN samples were then fixed in 4%

456 paraformaldehyde for 18-20 hours, rinsed in PBS, dehydrated in a series of progressively  
457 more concentrated solutions of ethanol/xylol and finally embedded in paraffin wax.  
458 Transverse sections (10  $\mu\text{m}$  thick) were cut, deparaffinized, rehydrated, processed for  
459 routine hematoxylin and eosin and mounted in silane-coated slides. Images were captured  
460 with 5x magnification by a Leica DMRB microscope equipped with the DFC480 digital  
461 camera (Leica Microsystems, Cambridge, UK). Sections at the level of the implanted  
462 electrodes were aligned and manually segmented to study the electrode–nerve interaction.  
463 The nerve was cross-sectioned for the entire length of the implants, with the two SELINEs  
464 fixed in site, and stained with hematoxylin and eosin. Light microscopy observations of VN  
465 sections showed the fascicular structure of the nerve and holes caused by the electrode  
466 insertion, with SELINE polyimide strips preserved in a few slices. No macroscopic and  
467 microscopic signs of hemorrhages were found.

468

469 **In vivo recording of VN activity.** Neural recordings started at least 30 min after electrode  
470 implantation to allow for stabilization of the nerve and of physiological parameters. The  
471 neural signals were first acquired over 5 minutes at baseline, followed by recording sessions  
472 in which physiological parameters were altered (functional challenges). The baseline  
473 condition was defined as the time BP and heart rate were found stable for at least 30 min  
474 after completion of electrodes implantation. At baseline, RR and TV were fixed at 10  
475 respiratory cycles per minute and 400 ml, respectively. The functional challenges consisted  
476 of 1) increase in mean arterial BP up to 150% of the baseline value obtained with an  
477 intravenous infusion of Ang II (Sigma Aldrich), a vasopressor with rapidly reversible  
478 effects<sup>50</sup>, at 80 ng/kg/min 2) increase in TV from 400 to 500 in p2 and 800 ml in p3 and p4  
479 for 2 minutes and 3) increase in RR from 10 to 15 in p2 and 20 in p3 and p4 respiratory  
480 cycles/min. These challenges were produced in random order and each one was followed

481 by a recovery period of at least five minutes to let the physiological parameters return to  
482 baseline values. These functional challenges and the related physiological parameters  
483 affected were in the same range of the ones used by Sevcencu et al.<sup>21</sup> and proved suitable  
484 for neural VN recordings in anesthetized pigs. In addition, they did not interfere significantly  
485 with the stability of other variables like BP, heart rate or blood gases partial pressures.  
486 Glycemia and blood gases were checked before and after the completion of each functional  
487 challenge.

488

489 **Data acquisition and decoding algorithm.** VN raw multichannel signals were acquired at  
490 a frequency sampling of 24.4 kHz, high pass filtered at 5 Hz and digitally amplified (RZ5D  
491 BioAmp Processor, Pz5, Tucker-Davis Technologies Inc., TDT, USA). Each channel of the  
492 raw recordings was segmented by using a 1 sec-temporal window and rescaled to zero  
493 mean and unitary standard deviation. Discrete wavelet transform<sup>33,34</sup>, at a maximum level  
494 equal to 4, was applied on the segmented portions of each channel by using a symlet 7  
495 wavelet function<sup>13,33,34</sup>. Approximation coefficients relative to frequencies  $\lesssim$  1500 Hz were  
496 discarded in the subsequent analysis. Principal component analysis on the multivariate  
497 wavelet details was applied independently on two different scales<sup>35</sup> relative to frequency  
498 ranges of  $\cong$ 1500-3000 Hz and 3000-6000 Hz, respectively. The first three principal  
499 components were retained to build a feature vector for the classification algorithm. The  
500 entire dataset was randomly split in 70 % for the train set and the remaining 30% was used  
501 as test set. Ensemble of classifiers were built using a classification tree<sup>36,37</sup>. To deal with  
502 class imbalance problems, random undersampling techniques combined with boosting  
503 algorithms were adopted (RUSBoost)<sup>37,51</sup>. To achieve higher ensemble accuracy, we set  
504 the maximal depth of the decision tree equal to the number of the element in the train set.



505 We set the learning rate and the number of cycles to 0.1 and 1000, respectively, in order to  
506 achieve higher accuracy as well.

507 Classification performance was assessed on the test set by calculating accuracy of the  
508 corresponding confusion matrices. The accuracy level was calculated by considering the  
509 number of correct predictions divided by the total number of elements in the test set.  
510 Confidence intervals for accuracy values were computed by using Clopper-Pearson method.  
511 Chance level was estimated as the proportion of the class with the majority of elements with  
512 respect to the total number of elements.

513 Data were analyzed off-line in MATLAB (The MathWorks, Inc.).

514

515 **Discrimination analysis and decoding-discrimination relationship.** Similarly to previous  
516 studies<sup>20</sup>, we built a discrimination channel index to understand the discrimination ability of  
517 the electrodes and consequentially a possible relation with decoding performances. To this  
518 aim, we calculated the percentage of activation for each channel relative to the different  
519 functional challenges as described below.

520 For each challenge, each signal was reconstructed using the wavelet details at the same  
521 scale previously used for the decoding algorithm:

522 
$$x_s(t) \approx \sum_{j=1}^2 \sum_k d_{s,j}[k] * \psi_{jk}(t)$$

523 where  $d_{s,j}[k]$  are the wavelet details at scale  $j$  of the recording site  $s$ , and  $\psi_{jk}(t)$  is the  
524 wavelet function (see Supplementary Figure 3a,b for a graphical example). The  
525 reconstructed signals from each recording sites ( $X = \{x_s\}$ ,  $i = 1, \dots, S$ ) were segmented  
526 using a temporal window of  $T=1$  sec and rescaled to zero mean and unitary standard  
527 deviation obtaining a number of signal's blocks  $N_{block}$ , i.e.  $X = (X(1), \dots, X(N_{block}))$ . For  
528 each block of the signals, we calculated the first three principal component coefficients

529 (loadings), i.e.  $P^{i_{pca}}(i_{block})$  with  $i_{pca} = 1,2,3$  and  $i_{block} = 1, \dots, N_{block}$ . We thus identified for  
530 each principal component the higher outliers relative to loadings' absolute values. Outliers  
531 were identified using a threshold of three scaled mean absolute deviation from the median  
532 (see Supplementary Figure 3c, right panel for a graphical example). When an outlier was  
533 identified in a portion of the signal, a value equal to unity was assigned to the corresponding  
534 channel ('channel activated') and zero otherwise, i.e. we defined an indicator for each  
535 channel  $s$  and block  $i_{block}$ :

536

$$537 \quad I_s^{i_{pca}}(i_{block}) = \begin{cases} 1 & \text{if loading of } i_{pca} \text{ w.r.t. channel } s \text{ is outlier} \\ 0 & \text{otherwise} \end{cases}$$

538

539 For each channel, the resulting percentage of activation relative to a principal component  
540  $\mu_s^{i_{pca}}$ , is equal to the number of times in which the channel was activated divided by the total  
541 number of portions of the signal, i.e.

$$542 \quad \mu_s^{i_{pca}} = \frac{\sum_{i_{block}=1}^{N_{block}} I_s^{i_{pca}}(i_{block})}{N_{block}}$$

543 The percentage of activation of each channel was quantified as the mean over the  
544 percentage of activation of the channel in each principal component (see Supplementary

$$545 \quad \text{Figure 3c left panel) } \mu_s = \frac{\sum_{i_{pca}=1}^3 \mu_s^{i_{pca}}}{3}.$$

546 Similarly to Raspopovic et. al<sup>20</sup>, given the percentage of activation for each channel, we  
547 defined a discrimination index for each channel as the difference between the percentage  
548 of activation of the considered channel and the mean percentage of activation over the  
549 remaining channels, i.e.

550

$$D_s = \mu_s - \frac{1}{N_s - 1} \sum_{s=1, i \neq l}^{N_s} \mu_l.$$

551

552

553

554

555

556

557

558

559

560

561

562

563

564

565

566

567

568

569

570

571

572

573

Thus, discrimination vectors with entries made of channels' discrimination indices were obtained among the different functional challenges, i.e.  $D_c = \{D_{c,s}\}$  with  $c = \{Baseline, BPC, TVC, RRC\}$  and  $s = 1, \dots, S$ . The difference between two generic discrimination vectors was obtained by considering the root mean square level of the Euclidean distance (see Supplementary Figure 4a). Electrode discrimination ability was computed by considering the mean over all the six possible combination distances between the distinct discrimination vectors (see Supplementary Figure 4a). Finally, a linear correlation coefficient was calculated between the electrode discrimination ability and the decoding performance (accuracy) and the least-squares line was plotted.

**Hybrid modelling of the recording process and Discriminative Field Potentials.** To understand the distribution of the electrical field potential within a nerve, we employed the hybrid modeling framework as described in <sup>38,39,41</sup>. Histological sections were manually segmented by defining the contours of the epineural compartment (the whole nerve section contour) and of the fascicles. Such contours were imported in MATLAB as closed polylines. Fascicle polylines were substituted with ellipses having the same surface area as the fascicles, center of the fascicle centroid, axis length ratio and orientation were deduced from the minimum (area) bounding rectangle of each fascicle. The perineurial sheath for each fascicle was defined as a layer with width equal to 0.03 times the effective diameter (diameter of the equivalent circle) of the fascicle<sup>52</sup>. A 3D extrusion of the given nerve section was defined in COMSOL (through MATLAB LiveLink for COMSOL) and it was included in a saline bath whose external surface was grounded (simulation of zero potential at infinity <sup>39</sup>).

574 A point current source was defined corresponding to each electrode active site center. To  
575 obtain the potential field on the nerve section (up to a multiplicative scaling factor, i.e.  
576 linearity assumption), we simulated the stimulation from all given sites with an adimensional  
577 current (one at the time and unitary). Indeed, thanks to the Helmholtz reciprocity theorem,  
578 the value of the potential field due to a unitary current injected by an active site corresponds  
579 to the impedance that relates the intensity of a current source with the resulting potential  
580 field recorded at the site surface. This means that a higher electrical field in a point in space  
581 P leads to a higher amplitude of the recorded electrical activity of a fibre located in P <sup>42</sup>.  
582 Given the knowledge of the electric field potential generated from a fascicle and the  
583 corresponding recording capability of a given recording site, we wanted to link this  
584 information to the discrimination properties of the recording site. To this aim, we defined a  
585 measure, that we called Discriminative Field Potential (DFP), by weighting the recording  
586 capabilities of a recording site  $s$  from a given fascicles  $F$  together with the discrimination  
587 properties of the recording site  $s$  related to a functional challenge  $c$ , i.e.

588

$$DFP_{c,F} = \frac{\sum_{S=1}^S D_{c,S} \varphi_{S,F}}{\sum_{S=1}^S \varphi_{S,F}}$$

589 where  $D_{c,S}$  is the discrimination ability to a functional challenge  $c$  and recording site  $s$ , and  
590  $\varphi_{S,F}$  is the mean field inside a fascicle  $F$  recorded from a site  $s$  (calculated by averaging  
591 isopotential values of the potential field inside the fascicle) . Since the  $\varphi_{S,F}$  measures how  
592 a site  $s$  is capable of recording from a given fascicle, and  $D_{c,S}$  measures how site  $s$  records  
593 better the activity related to a functional challenge  $c$  with respect to the other sites, then the  
594  $DFP_{c,F}$  is a quantity measuring how a fascicle is related to a given functional challenge.

595 Similarly to the calculation of electrode discrimination ability, to quantify the discrimination  
596 ability of the whole nerve section, we computed the root mean square level of the Euclidean  
597 distance of the *DFP* values in the fascicle space. We thus calculated the mean  
598 discrimination distance by considering the mean over all the six possible combinations of  
599 functional challenges.

600 **Statistical analysis.** Unless otherwise stated, data are expressed as mean  $\pm$  s.e.m.  
601 Statistical significance between accuracies were assessed by means of Chi square test  
602 Bonferroni corrected for multiple comparisons. Confidence intervals for the accuracy values  
603 were calculated using the Clopper-Pearson method. Statistical significance of accuracy  
604 values with respect to chance level was assessed by using the binomial test. Statistical  
605 significance between the discrimination ability of nerve sections was assessed by using two-  
606 tailed unpaired t-test at a significance threshold equal to 0.05. To test for normality of data  
607 distribution a Kolmogorov-Smirnov test was used on each population of data. Statistical  
608 analysis was performed with MATLAB (The MathWorks, Inc.).

609

610

611

612

613

614

615

616

617

618

## 619 **References**

- 620 1. Birmingham, K. *et al.* Bioelectronic medicines: A research roadmap. *Nat. Rev. Drug*  
621 *Discov.* **13**, 399–400 (2014).
- 622 2. Famm, K., Litt, B., Tracey, K. J., Boyden, E. S. & Slaoui, M. A jump-start for  
623 electroceuticals. *Nature* **496**, 159–161 (2013).
- 624 3. Sevcencu, C., Nielsen, T. N. & Struijk, J. J. A neural blood pressure marker for  
625 bioelectronic medicines for treatment of hypertension. *Biosens. Bioelectron.* **98**, 1–6  
626 (2017).
- 627 4. Johnson, R. L. & Wilson, C. G. A review of vagus nerve stimulation as a therapeutic  
628 intervention. *J. Inflamm. Res.* **11**, 203–213 (2018).
- 629 5. George, R. *et al.* A randomized controlled trial of chronic vagus nerve stimulation for  
630 treatment of medically intractable seizures. *Neurology* **45**, 224–230 (1995).
- 631 6. Klein, H. U. & De Ferrari, G. M. Vagus nerve stimulation: A new approach to reduce  
632 heart failure. *Cardiol. J.* **17**, 638–643 (2010).
- 633 7. Koopman, F. A. *et al.* Vagus nerve stimulation inhibits cytokine production and  
634 attenuates disease severity in rheumatoid arthritis. *Proc. Natl. Acad. Sci.* **113**, 8284–  
635 8289 (2016).
- 636 8. Bonaz, B. *et al.* Chronic vagus nerve stimulation in Crohn's disease: A 6-month  
637 follow-up pilot study. *Neurogastroenterol. Motil.* **28**, 948–953 (2016).
- 638 9. Yuan, H. & Silberstein, S. D. Vagus Nerve and Vagus Nerve Stimulation, a  
639 Comprehensive Review: Part II. *Headache* **56**, 259–266 (2016).
- 640 10. Tracey Kevin J. The inflammatory reflex. *Nature* **257**, 122–125 (2005).
- 641 11. Meyers, E. C. *et al.* Vagus nerve stimulation enhances stable plasticity and  
642 generalization of stroke recovery. *Stroke* **49**, 710–717 (2018).

- 643 12. J.P., B., T., B., Beekwilder, J. P. & Beems, T. Overview of the clinical applications of  
644 vagus nerve stimulation. *J. Clin. Neurophysiol.* **27**, 130–138 (2010).
- 645 13. Citi, L. *et al.* On the use of wavelet denoising and spike sorting techniques to  
646 process electroneurographic signals recorded using intraneural electrodes. *J.*  
647 *Neurosci. Methods* **172**, 294–302 (2008).
- 648 14. Ganzer, P. D. & Sharma, G. Opportunities and challenges for developing closed-  
649 loop bioelectronic medicines. *Neural Regen. Res.* **14**, 46–50 (2019).
- 650 15. Zanos, S. Closed-Loop Neuromodulation in Physiological and Translational  
651 Research. *Cold Spring Harb. Perspect. Med.* a034314 (2018)  
652 doi:10.1101/cshperspect.a034314.
- 653 16. Micera, S., Carpaneto, J. & Raspopovic, S. Control of hand prostheses using  
654 peripheral information. **3**, 48–68 (2010).
- 655 17. Sun, F. T. & Morrell, M. J. Closed-loop Neurostimulation: The Clinical Experience.  
656 *Neurotherapeutics* **11**, 553–563 (2014).
- 657 18. Bouton, C. Neural decoding and applications in bioelectronics medicine. *Bioelectron.*  
658 *Med.* **2**, 20–24 (2015).
- 659 19. Xue, N., Martinez, I. D., Sun, J., Cheng, Y. & Liu, C. Flexible multichannel vagus  
660 nerve electrode for stimulation and recording for heart failure treatment. *Biosens.*  
661 *Bioelectron.* **112**, 114–119 (2018).
- 662 20. Raspopovic, S., Capogrosso, M., Badia, J., Navarro, X. & Micera, S. Experimental  
663 validation of a hybrid computational model for selective stimulation using transverse  
664 intrafascicular multichannel electrodes. *IEEE Trans. Neural Syst. Rehabil. Eng.* **20**,  
665 395–404 (2012).
- 666 21. Sevcencu, C., Nielsen, T. N., Kjærgaard, B. & Struijk, J. J. A Respiratory Marker  
667 Derived From Left Vagus Nerve Signals Recorded With Implantable Cuff Electrodes.

- 668 *Neuromodulation* **21**, 269–275 (2017).
- 669 22. Metcalfe, B. W., Nielsen, T. N., Donaldson, N. de N., Hunter, A. J. & Taylor, J. T.  
670 First demonstration of velocity selective recording from the pig vagus using a nerve  
671 cuff shows respiration afferents. *Biomed. Eng. Lett.* **8**, 127–136 (2018).
- 672 23. Zanos, T. P. *et al.* Identification of cytokine-specific sensory neural signals by  
673 decoding murine vagus nerve activity. *Proc. Natl. Acad. Sci. U. S. A.* **115**, E4843--  
674 E4852 (2018).
- 675 24. Battinelli, E. *et al.* Identification of hypoglycemia-specific neural signals by decoding  
676 murine vagus nerve. *Bioelectron. Med.* **115**, E4843–E4852 (2018).
- 677 25. Cracchiolo, M. *et al.* Decoding Neural Metabolic Markers From the Carotid Sinus  
678 Nerve in a Type 2 Diabetes Model. **27**, 2034–2043 (2019).
- 679 26. Navarro, X. *et al.* A Critical Review of Interfaces with the Peripheral Nervous System  
680 for the Control of Neuroprotheses and Hybrid Bionic Systems. *J Peripher Nerv Syst*  
681 **10**, 229–258 (2005).
- 682 27. Raspopovic, S., Carpaneto, J., Udina, E., Navarro, X. & Micera, S. On the  
683 identification of sensory information from mixed nerves by using single-channel cuff  
684 electrodes. *J. Neuroeng. Rehabil.* **7**, 1–15 (2010).
- 685 28. Rozman, J. & Ribarič, S. Selective recording of electroneurograms from the left  
686 vagus nerve of a dog during stimulation of cardiovascular or respiratory systems.  
687 *Chin. J. Physiol.* **50**, 240–250 (2007).
- 688 29. Micera, S. *et al.* Decoding of grasping information from neural signals recorded  
689 using peripheral intrafascicular interfaces. *J. Neuroeng. Rehabil.* **8**, 53 (2011).
- 690 30. Rossini, P. M. *et al.* Double nerve intraneural interface implant on a human amputee  
691 for robotic hand control. *Clin. Neurophysiol.* **121**, 777–783 (2010).
- 692 31. Cracchiolo, M. *et al.* Decoding of grasping tasks from intraneural recordings in trans-



- 693 radial amputee. *J. Neural Eng.* 0–35 (2020) doi:10.1088/1741-2552/ab8277.
- 694 32. Sevcencu, C., Nielsen, T. N. & Struijk, J. J. An Intra-neural Electrode for Bioelectronic  
695 Medicines for Treatment of Hypertension. *Neuromodulation* **21**, 777–786 (2018).
- 696 33. Mallat, S. *A Wavelet Tour of Signal Processing. A Wavelet Tour of Signal*  
697 *Processing* (Elsevier Inc., 2009). doi:10.1016/B978-0-12-374370-1.X0001-8.
- 698 34. Mallat, S. G. A Theory for Multiresolution Signal Decomposition: The Wavelet  
699 Representation. *IEEE Trans. Pattern Anal. Mach. Intell.* **11**, 674–693 (1989).
- 700 35. Bakshi, B. R. Multiscale PCA with application to multivariate statistical process  
701 monitoring. *AIChE J.* **44**, 1596–1610 (1998).
- 702 36. Breiman, L., Friedman, J. H. (Jerome H. ., Olshen, R. A. & Stone, C. J. *Classification*  
703 *and regression trees.*
- 704 37. Hastie, Trevor, Tibshirani, Robert, Friedman, J. *The Elements of Statistical Learning*  
705 *The Elements of Statistical Learning Data Mining, Inference, and Prediction, Second*  
706 *Edition. Springer series in statistics* (2009). doi:10.1007/978-0-387-84858-7.
- 707 38. Raspopovic, S., Capogrosso, M. & Micera, S. A computational model for the  
708 stimulation of rat sciatic nerve using a transverse intrafascicular multichannel  
709 electrode. *IEEE Trans. Neural Syst. Rehabil. Eng.* **19**, 333–344 (2011).
- 710 39. Raspopovic, S., Petrini, F. M., Zelechowski, M. & Valle, G. Framework for the  
711 Development of Neuroprostheses: From Basic Understanding by Sciatic and Median  
712 Nerves Models to Bionic Legs and Hands. *Proc. IEEE* **105**, 34–49 (2017).
- 713 40. Boretius, T. *et al.* A transverse intrafascicular multichannel electrode (TIME) to  
714 interface with the peripheral nerve. *Biosens. Bioelectron.* **26**, 62–69 (2010).
- 715 41. Simone Romeni, Giacomo Valle, Alberto Mazzoni, S. M. Tutorial: A computational  
716 framework for the design and optimization of peripheral neural interfaces. *Nat.*  
717 *Protoc. in press*, (2020).

- 718 42. Jehenne, B., Raspopovic, S., Capogrosso, M., Arleo, A. & Micera, S. Recording  
719 properties of an electrode implanted in the peripheral nervous system: A human  
720 computational model. *Int. IEEE/EMBS Conf. Neural Eng. NER 2015-July*, 482–485  
721 (2015).
- 722 43. Paintal, A. S. Vagal sensory receptors and their reflex effects. *Physiol. Rev.* **53**,  
723 159–227 (1973).
- 724 44. Settell, M. L. *et al.* Functional Vagotomy in the Cervical Vagus Nerve of the Domestic  
725 Pig : Implications for Vagus Nerve Stimulation. 1–28 (2019).
- 726 45. Gaillet, V. *et al.* Spatially selective activation of the visual cortex via intraneural  
727 stimulation of the optic nerve. *Nat. Biomed. Eng.* (2019) doi:10.1038/s41551-019-  
728 0446-8.
- 729 46. Cutrone, A. *et al.* A three-dimensional self-opening intraneural peripheral interface  
730 ({SELINE}). *J. Neural Eng.* **12**, 16016 (2015).
- 731 47. Gabisonia, K. *et al.* MicroRNA therapy stimulates uncontrolled cardiac repair after  
732 myocardial infarction in pigs. *Nature* **569**, 418–422 (2019).
- 733 48. Labinsky, V. *et al.* Chronic activation of peroxisome proliferator-activated receptor- $\alpha$   
734 with fenofibrate prevents alterations in cardiac metabolic phenotype without  
735 changing the onset of decompensation in pacing-induced heart failure. *J.*  
736 *Pharmacol. Exp. Ther.* **321**, 165–171 (2007).
- 737 49. Badia, J., Raspopovic, S., Carpaneto, J., Micera, S. & Navarro, X. Spatial and  
738 functional selectivity of peripheral nerve signal recording with the transversal  
739 intrafascicular multichannel electrode (TIME). *IEEE Trans. Neural Syst. Rehabil.*  
740 *Eng.* **24**, 20–27 (2016).
- 741 50. Recchia, F. A. *et al.* Reduced synthesis of NO causes marked alterations in  
742 myocardial substrate metabolism in conscious dogs. *Am. J. Physiol. - Endocrinol.*

743 *Metab.* **282**, 197–206 (2002).

744 51. Galar, M., Fernandez, A., Barrenechea, E., Bustince, H. & Herrera, F. A review on  
745 ensembles for the class imbalance problem: Bagging-, boosting-, and hybrid-based  
746 approaches. *IEEE Trans. Syst. Man Cybern. Part C Appl. Rev.* **42**, 463–484 (2012).

747 52. Grinberg, Y., Schiefer, M. A., Tyler, D. J. & Gustafson, K. J. Fascicular perineurium  
748 thickness, size, and position affect model predictions of neural excitation. *IEEE*  
749 *Trans. Neural Syst. Rehabil. Eng.* **16**, 572–581 (2008).

750

751

752

753

754

755

756

757

758

759

760

761

762

763

764

765

766

767

768

769

770

771

772 **Supplementary Information:**

773 **Simultaneous decoding of cardiovascular and respiratory**  
774 **functional changes from pig intraneural vagus nerve signals**

775

776 **Supplementary Figure 1. Confusion matrices between baseline condition against one**  
777 **functional challenge a,b,c.** Comparison between baseline and BPC (panel a), RRC (panel b),  
778 TVC (panel c).

779

780 **Supplementary Figure 2. Confusion matrices between baseline condition against two**  
781 **functional challenges a,b,c** Comparison between baseline and BPC-RRC (panel a), BPC-TVC  
782 (panel b), RRC-TVC (panel c).

783

784 **Supplementary Figure 3. Discrimination analysis method. a** Raw recording. **b** Signal in the  
785 frequency band 1500-6000 Hz reconstructed throughout wavelet details used in the decoding  
786 algorithm (segmented in a temporal window of 1 sec). **c** Estimation of channels discrimination index.  
787 Right panel, outlier detection on PCA loadings for the different functional challenges. Left panel,  
788 schematic representation of the active sites in the electrode p4-s3 and percentage of activation level  
789 estimation in single channels.

790

791

792

793 **Supplementary Figure 4. Estimation of electrode discrimination ability and RMS level**  
794 **distance matrices examples. a** Estimation of electrode discrimination ability. Left panel, 3D  
795 graphical visualization example of discrimination index channel vectors for TVC and BPC challenges  
796 (green and yellow vectors, respectively). Middle panel, root mean square level distance matrix. Right  
797 panel, estimation of electrode discrimination ability by averaging over all possible (n=6) combination  
798 comparison of functional challenge.

799 b,c RMS level distance matrices in the electrode discrimination space for the comparison among  
800 baseline condition and the functional challenges (TVC, RRC, BPC) in two electrodes placed in  
801 different animals (p2-t2 and p3-s1) and two electrodes in the same animal (p4-s3 and p4-s4),  
802 respectively.

803

804 **Supplementary Figure 5 and 6. Discriminative Field Potential (DFP) estimation in pig p4e1**  
805 **and p4e2, respectively. a** Nerve cross-section and implanted electrode. The intraneural fascicles  
806 numerical are labeled with numbers  $i=1, \dots, N_{\text{fascicles}}$ . **b** Isopotential Electric field lines for three different  
807 recording sites. **c** DFP estimation procedure. Left panel, fascicle mean field for each site. Right  
808 panel, selectivity index for each site across the different functional challenges. Bottom panel, DFP  
809 values in each fascicle across the different functional challenges.

810

811

812

813

814

815

816

817

818

819

## Confusion Matrices Baseline vs. One Challenge

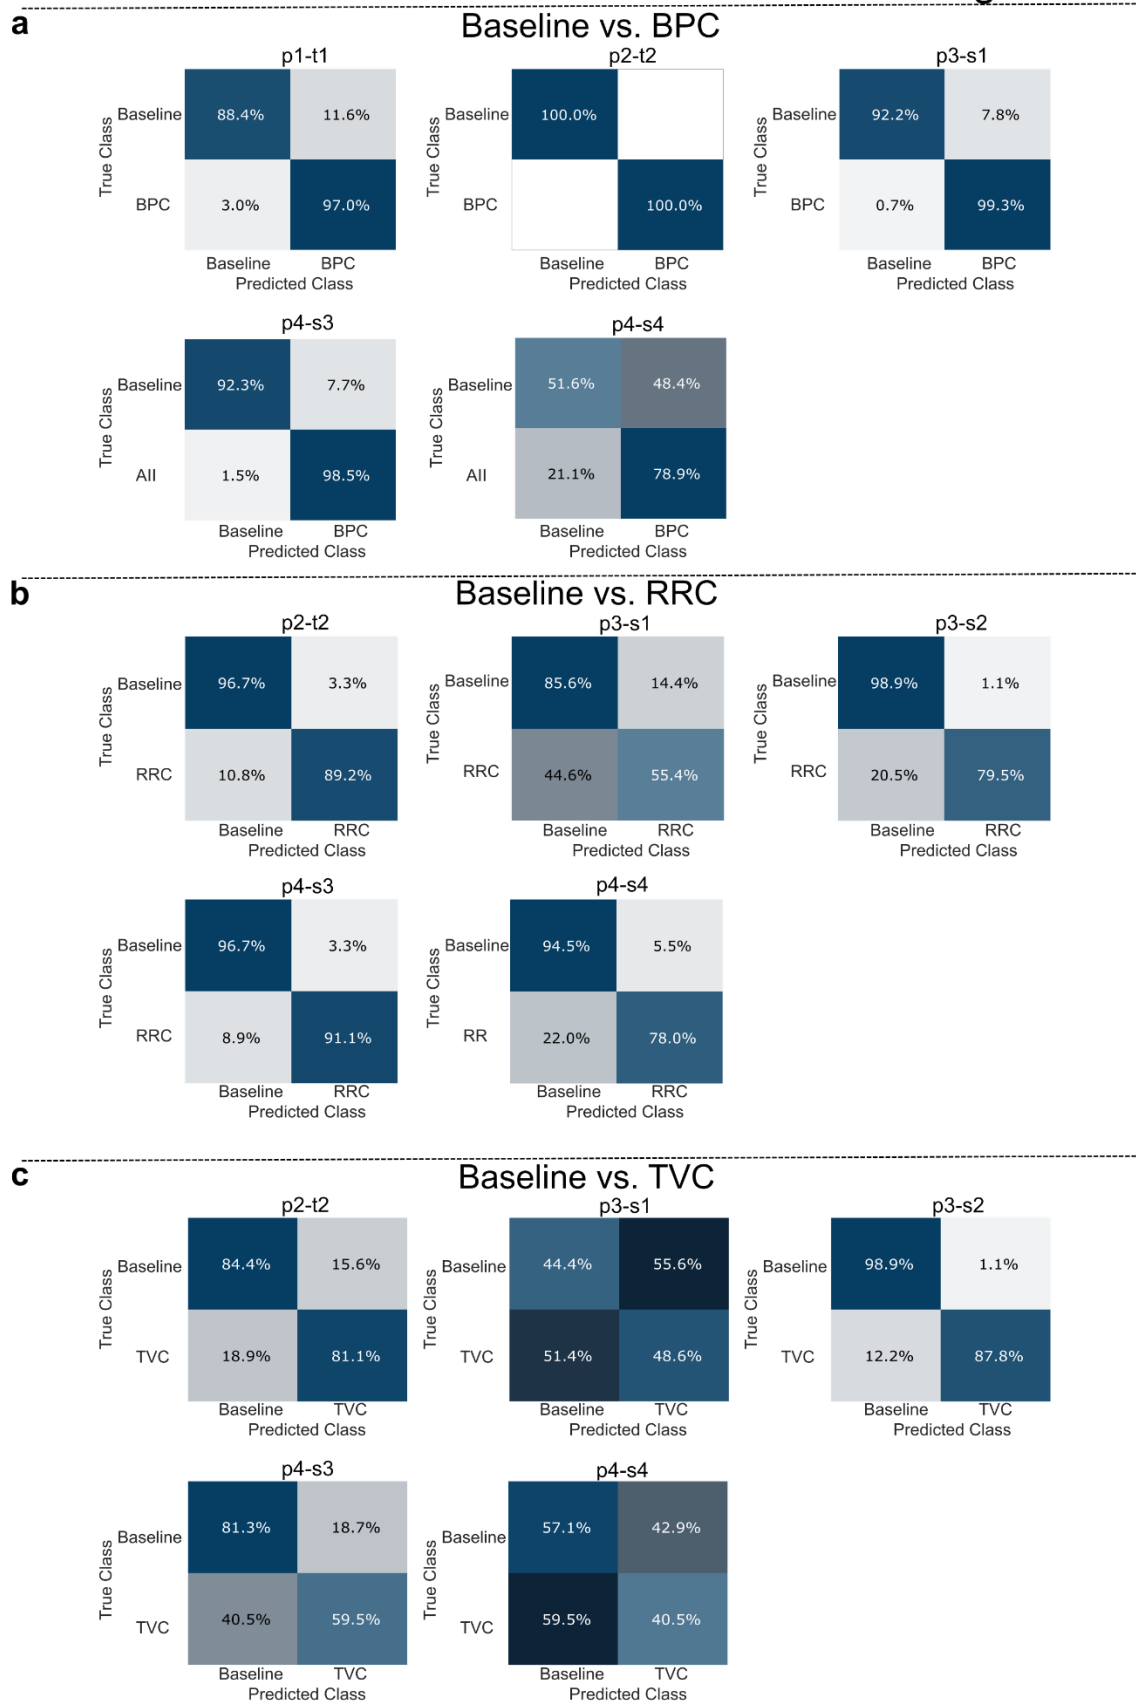

821 **Supplementary Figure 2**

**Confusion Matrices Baseline vs. Two Challenges**

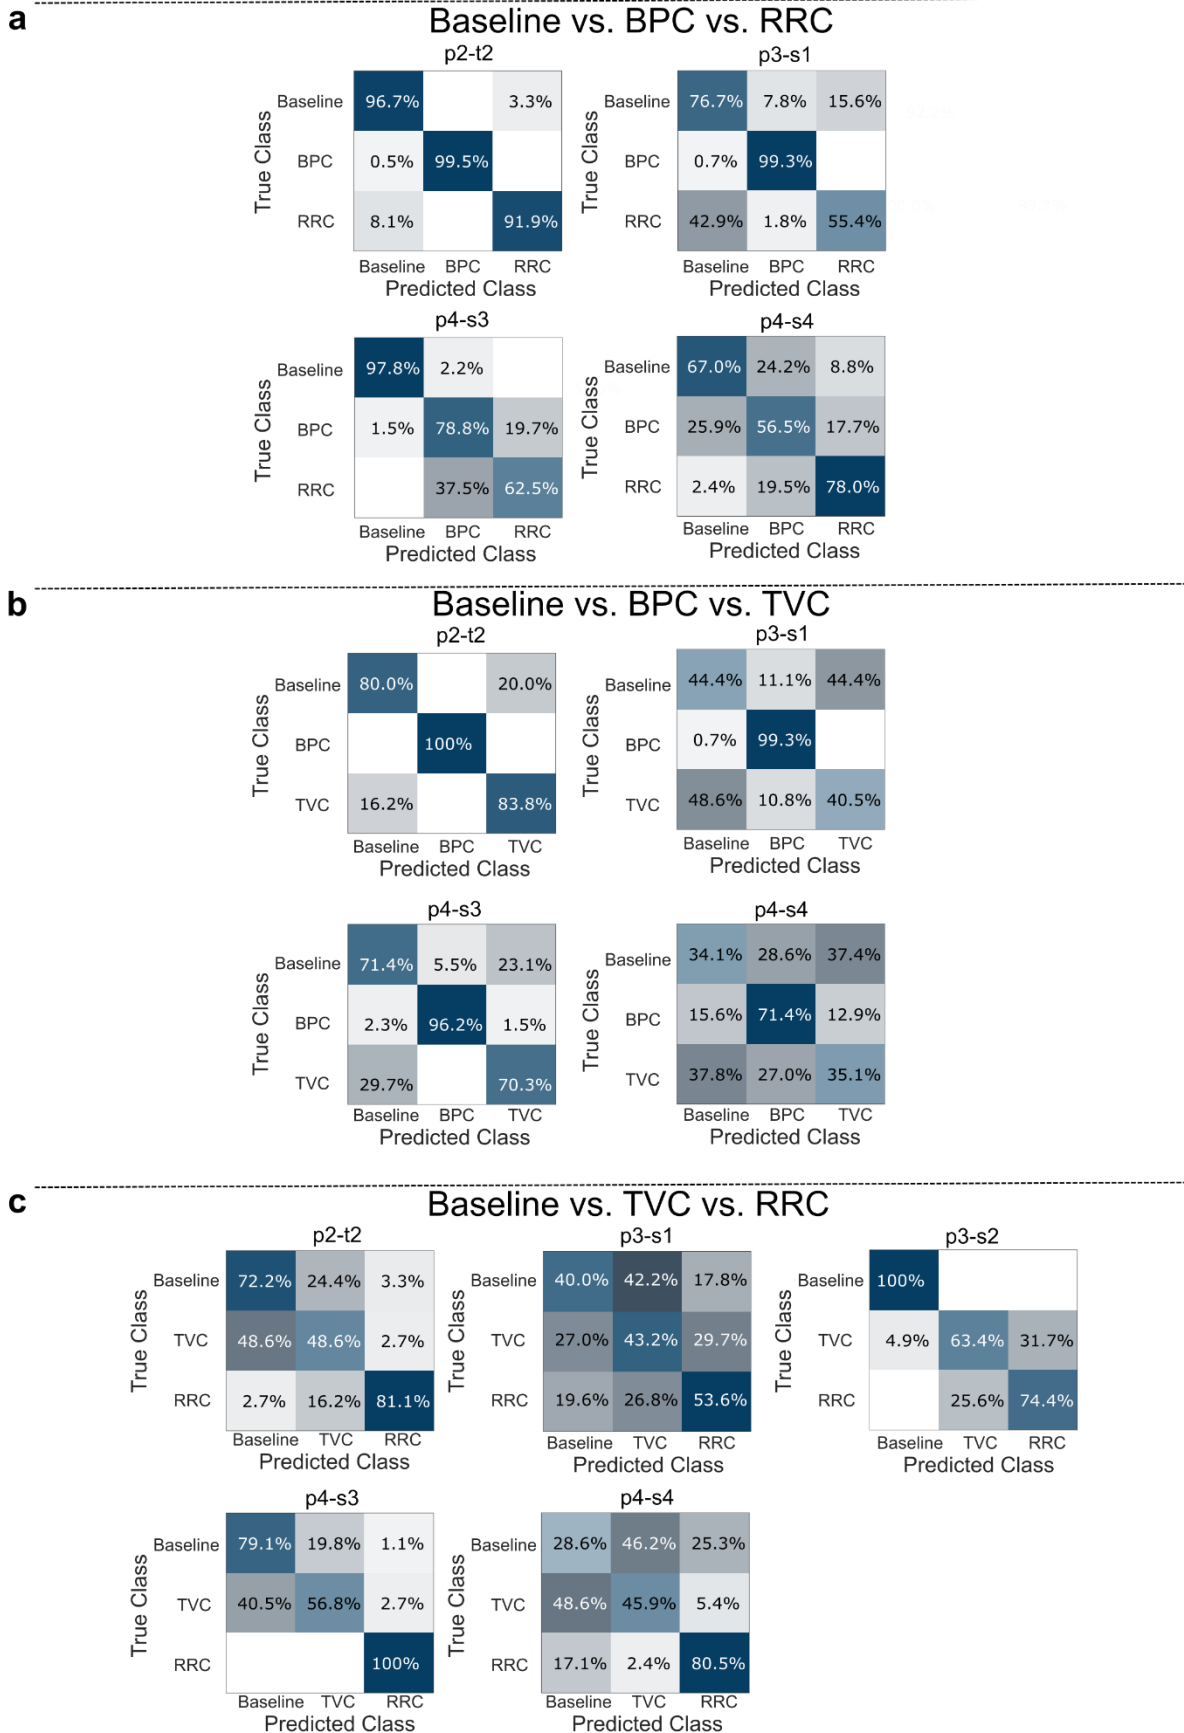

823 **Supplementary Figure 3**

**Discrimination Analysis Method**

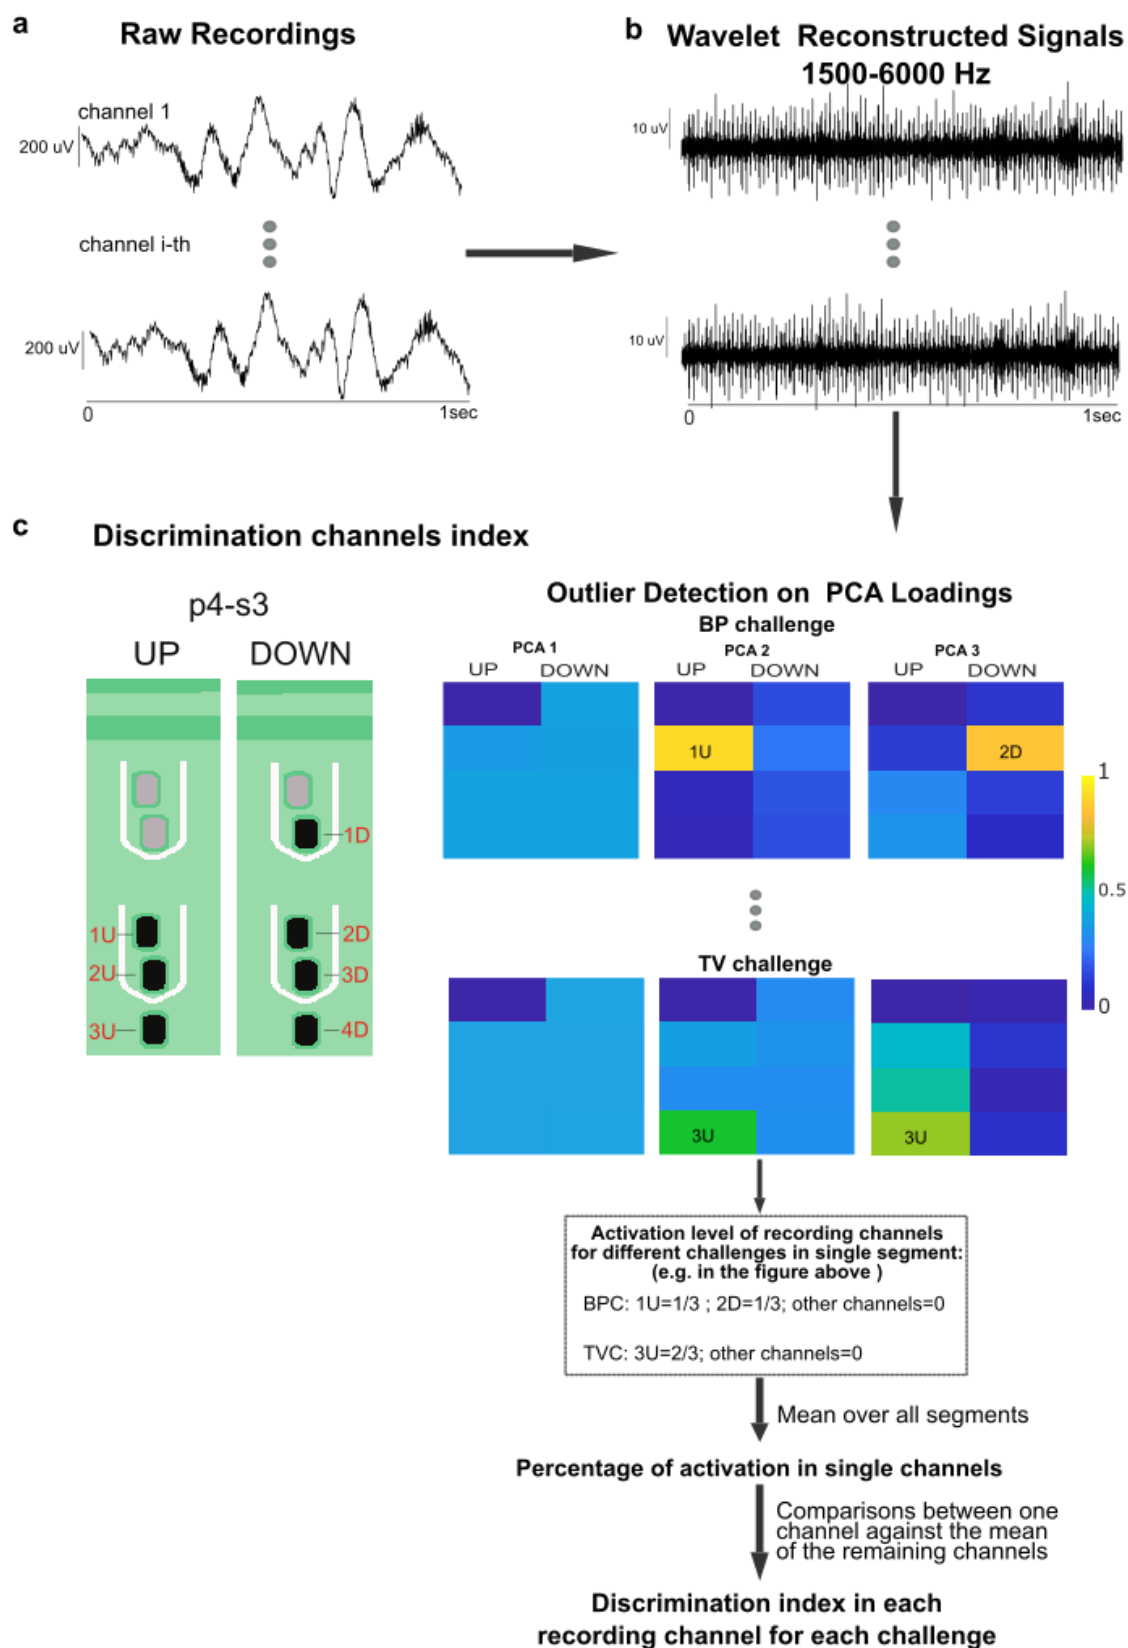



825

826 **Supplementary Figure 4**

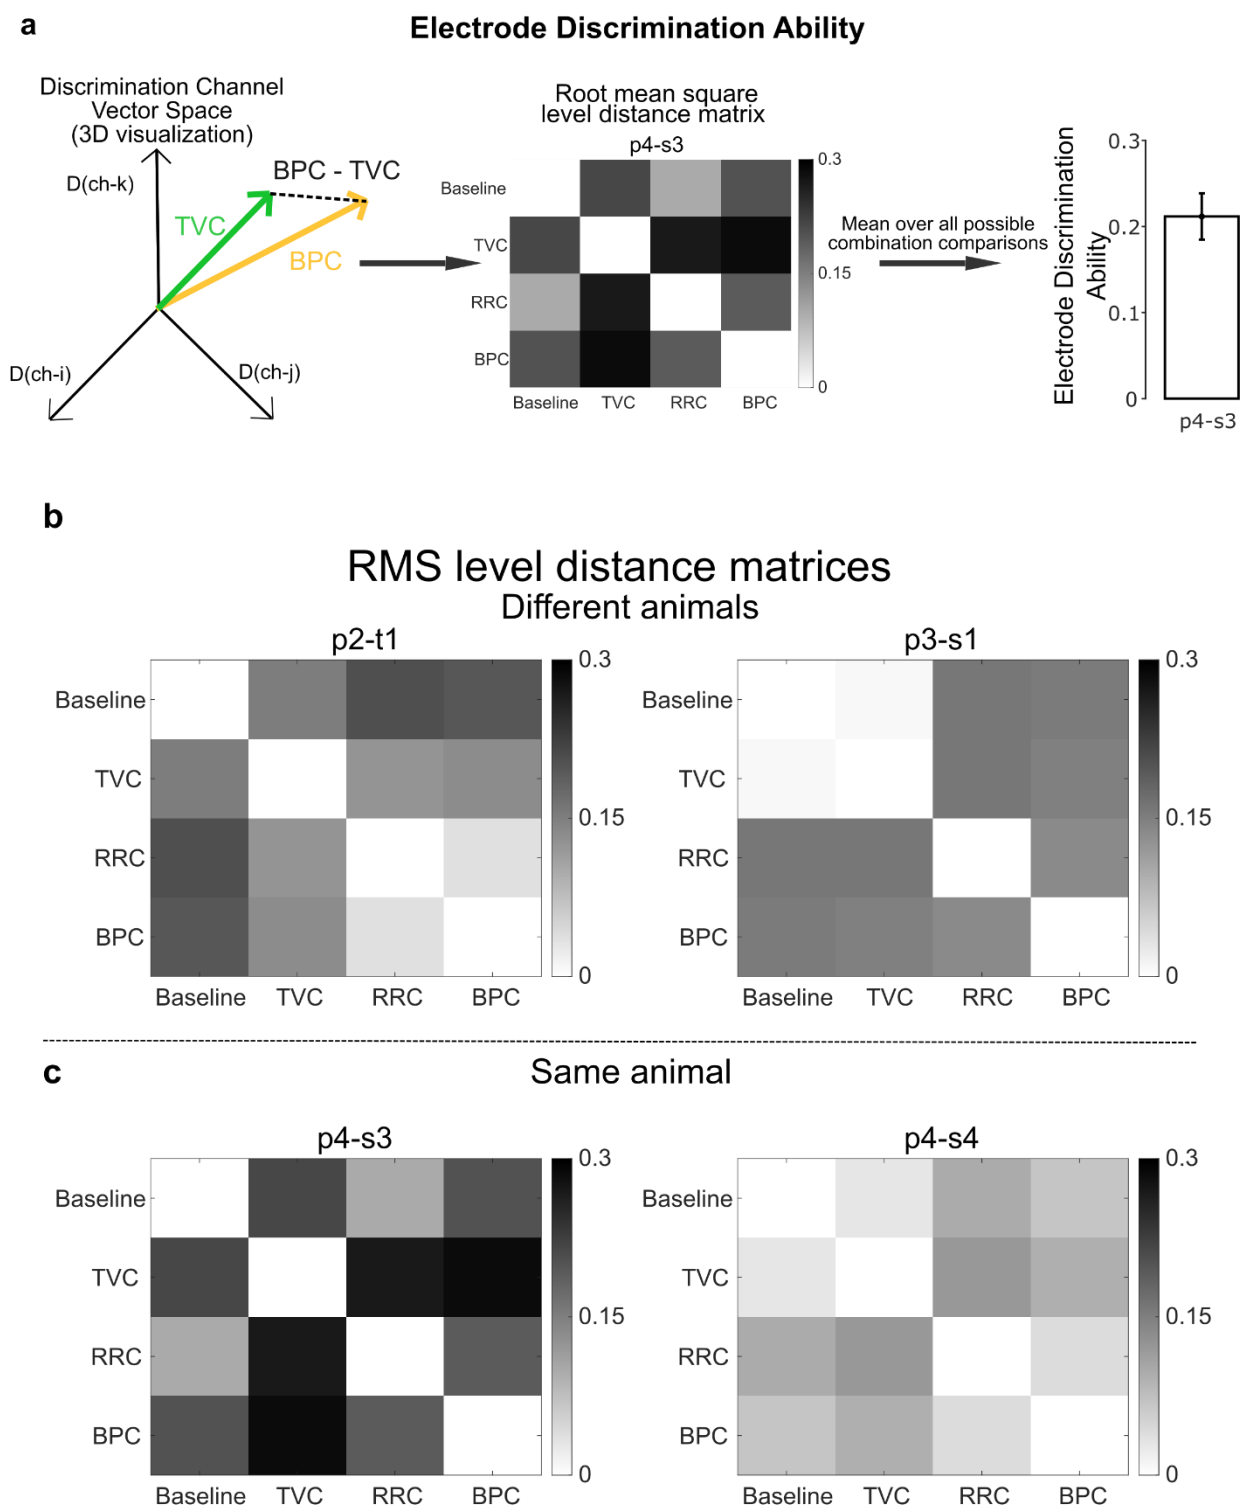

827

828 **Supplementary Figure 5**

829

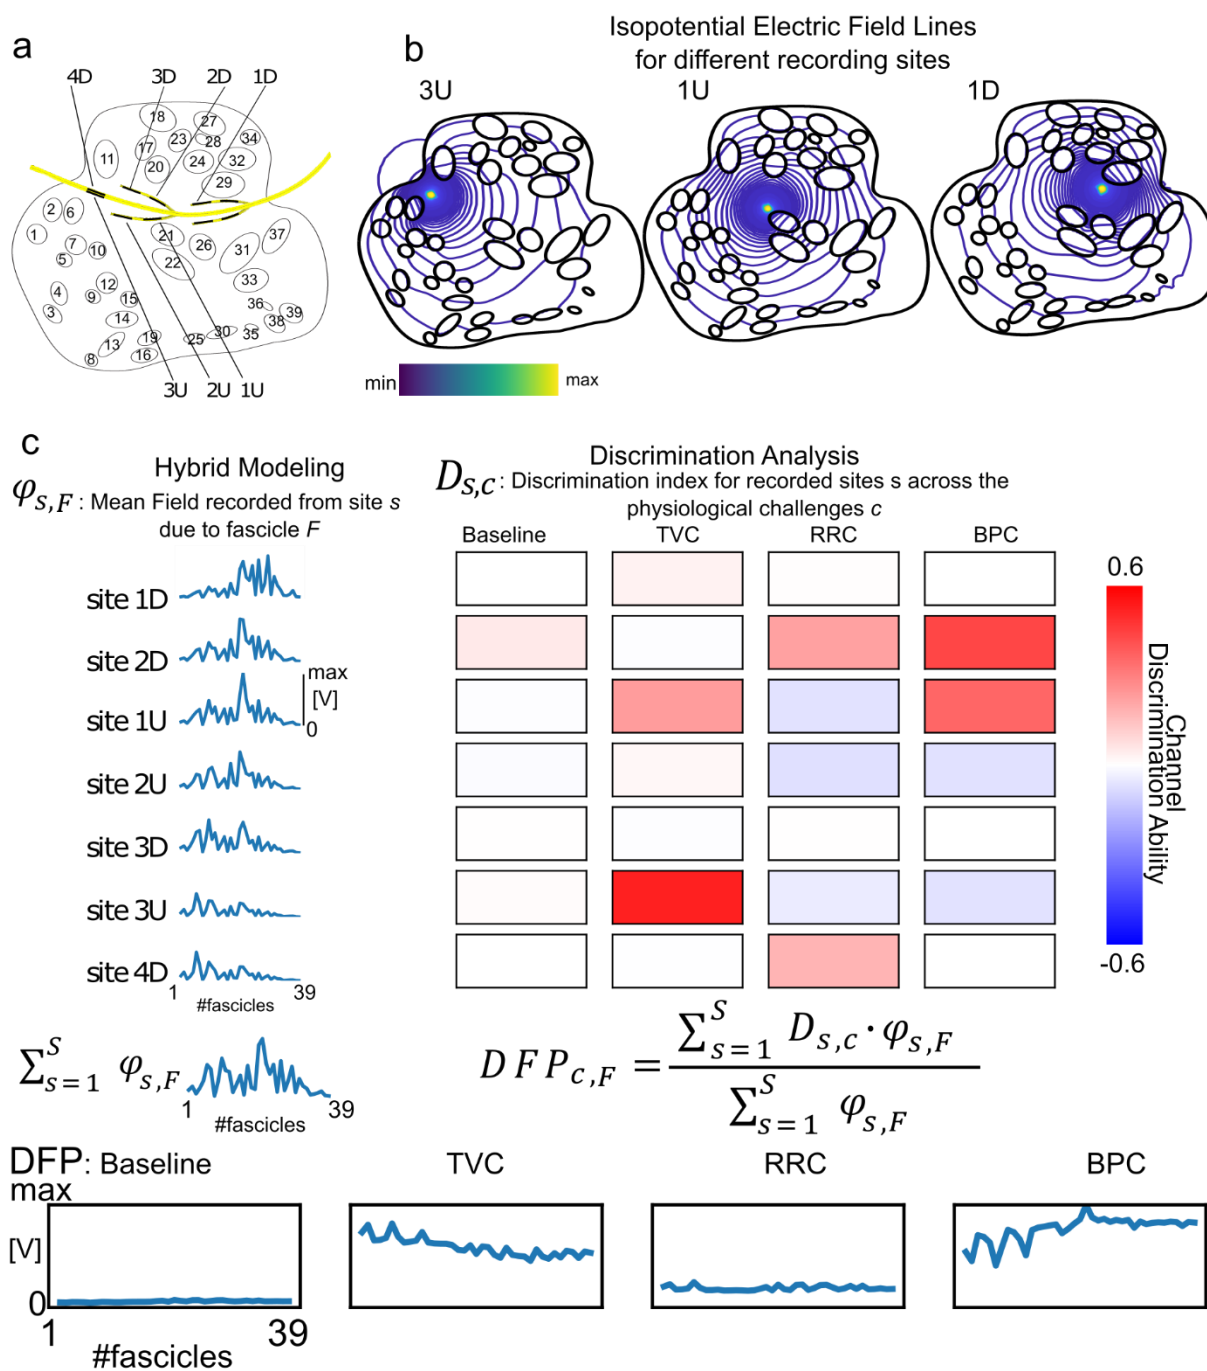

830

831

832

833

834

835

836

837

838

839 **Supplementary Figure 6**

840

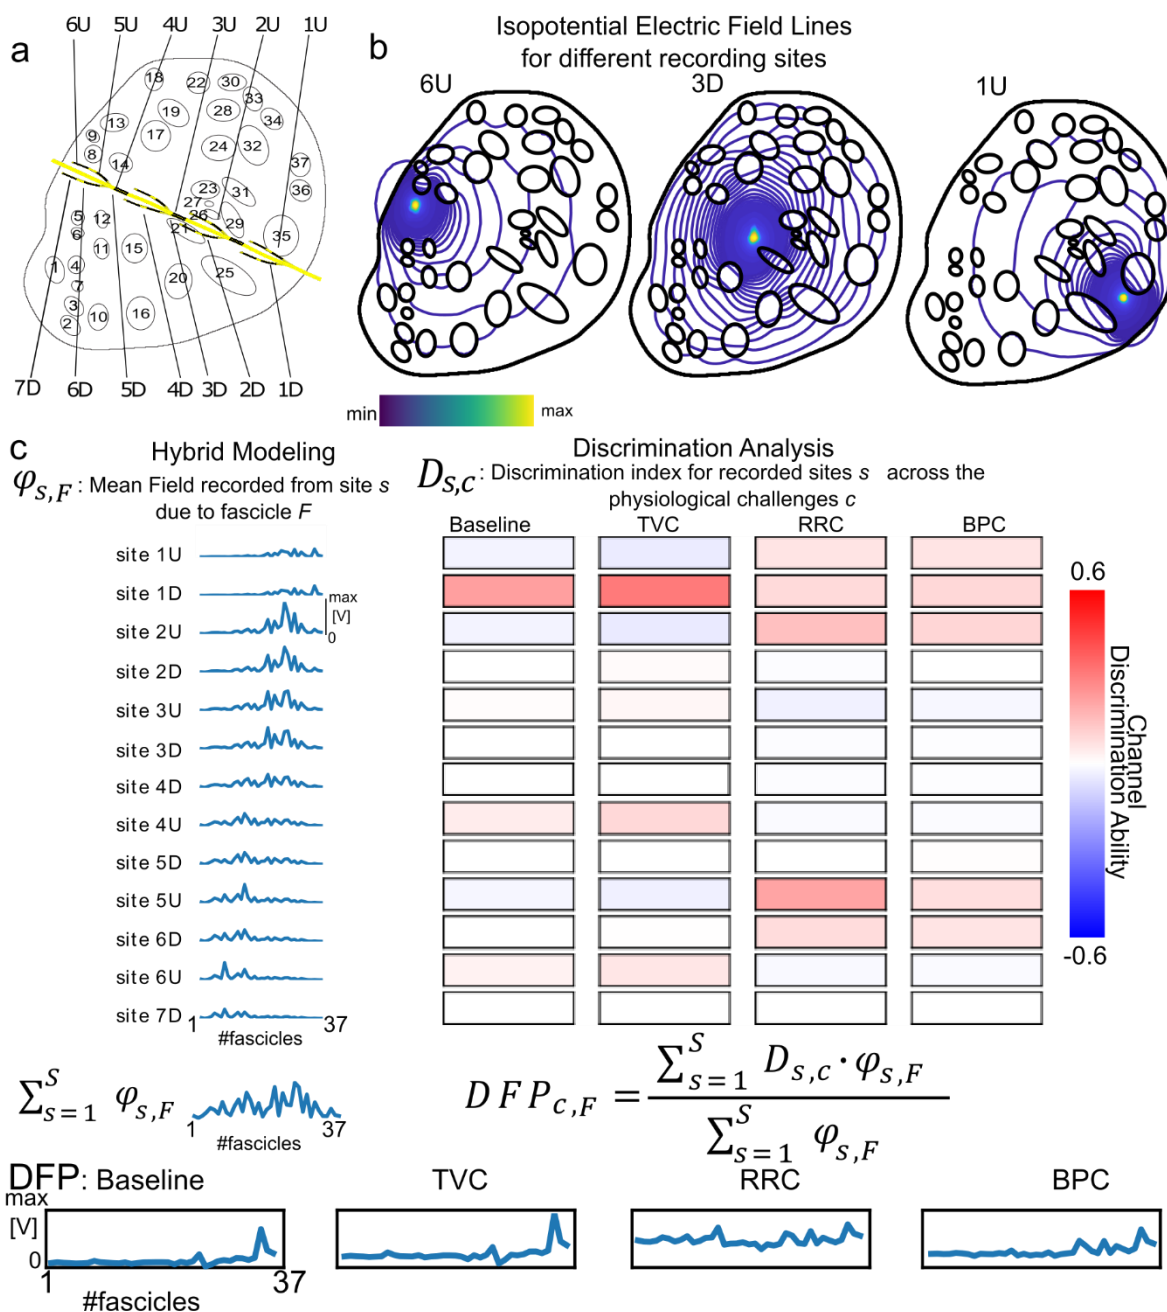

841
